# Supplementary material for: Non-innocent PNN ligand is important for CO oxidation by N2O catalyzed by a (PNN)Ru–H pincer complex: insights from DFT calculations
Source: Royal Society of Chemistry journal article supplement (doi:10.1039/c8dt03304h), 2018-01-01
Supplement: c8dt03304h1.pdf [file c8dt03304h1.pdf]

## Supporting Information

### **Non-innocent PNN ligand Is Important for CO Oxidation by N<sub>2</sub>O Catalyzed by (PNN)Ru–H Pincer Complex: Insights from DFT Calculations**

Hujun Xie,<sup>a,\*</sup> Yutong Zhang<sup>a</sup>, Chuyue Xiang<sup>a</sup>, Yang Li<sup>a</sup>, Ting Fan,<sup>b,\*</sup> Qunfang Lei,<sup>c</sup>  
Wenjun Fang<sup>c</sup>

*<sup>a</sup>Department Department of Applied Chemistry, Zhejiang Gongshang University,  
Hangzhou 310018, P. R. China*

*<sup>b</sup>School of Chemistry and Chemical Engineering, South China University of Technology,  
Guangzhou 510641, P. R. China*

*<sup>c</sup>Department of Chemistry, Zhejiang University, Hangzhou 310027, P. R. China*

#### TABLE OF CONTENT

|                                                                                            |        |
|--------------------------------------------------------------------------------------------|--------|
| I. CARTESIAN COORDINATES AND ELECTRONIC ENERGIES FOR ALL OF THE CALCULATED STRUCTURES..... | S2-S23 |
|--------------------------------------------------------------------------------------------|--------|

# I. Cartesian coordinates and electronic energies for all of the calculated structures

|                         |           |           |           |                        |           |           |           |
|-------------------------|-----------|-----------|-----------|------------------------|-----------|-----------|-----------|
| <b>1</b>                |           |           |           | H                      | 0.458099  | 4.288567  | -1.592787 |
| SCF done: -1176.161559  |           |           |           | H                      | -3.636422 | 3.212796  | -0.835451 |
| C                       | -0.059787 | 2.325176  | 0.024407  | Ru                     | -0.275558 | -0.475442 | 0.376552  |
| C                       | -0.558438 | 3.670574  | 0.086501  | H                      | -0.474459 | -0.693131 | -1.381418 |
| C                       | -1.899230 | 3.922204  | 0.075179  | P                      | 1.925095  | 0.307772  | -0.144784 |
| C                       | -2.827370 | 2.861400  | -0.003459 | C                      | 1.480482  | 1.888650  | -0.840067 |
| C                       | -2.324386 | 1.575641  | -0.025392 | H                      | 2.240413  | 2.585441  | -1.189891 |
| N                       | -0.999240 | 1.315374  | 0.038224  | C                      | 0.244076  | -2.286719 | 0.613588  |
| H                       | -2.258489 | 4.948476  | 0.112131  | O                      | 0.625839  | -3.366595 | 0.772721  |
| H                       | 0.163542  | 4.482740  | 0.123605  | C                      | 3.053695  | 0.666352  | 1.378216  |
| H                       | -3.891911 | 3.060168  | -0.057381 | C                      | 2.932320  | -0.662608 | -1.468294 |
| Ru                      | -0.379870 | -0.700694 | -0.053217 | C                      | 3.146642  | -0.556376 | 2.289657  |
| H                       | -0.372329 | -0.423931 | -1.667743 | H                      | 3.804355  | -0.325755 | 3.140079  |
| P                       | 1.781917  | 0.304544  | -0.103360 | H                      | 2.171176  | -0.837504 | 2.700743  |
| C                       | 1.289126  | 2.019357  | -0.058327 | H                      | 3.562211  | -1.433124 | 1.781354  |
| H                       | 2.023469  | 2.822323  | -0.029470 | C                      | 4.457699  | 1.117127  | 0.978517  |
| C                       | 0.215818  | -2.420367 | -0.518582 | H                      | 4.431514  | 1.966542  | 0.284400  |
| O                       | 0.600388  | -3.454868 | -0.877186 | H                      | 4.989779  | 1.451621  | 1.880772  |
| C                       | 2.878975  | -0.019263 | 1.451754  | H                      | 5.054938  | 0.315494  | 0.532105  |
| C                       | 2.848234  | 0.060439  | -1.687710 | C                      | 3.673973  | -1.850499 | -0.859960 |
| C                       | 2.960315  | -1.517733 | 1.744454  | H                      | 4.121559  | -2.441964 | -1.671330 |
| H                       | 3.592939  | -1.681133 | 2.628915  | H                      | 4.489804  | -1.552296 | -0.191981 |
| H                       | 1.975821  | -1.946605 | 1.961210  | H                      | 2.998831  | -2.517641 | -0.309030 |
| H                       | 3.399968  | -2.087106 | 0.917135  | C                      | 1.945482  | -1.192954 | -2.505570 |
| C                       | 4.291773  | 0.553580  | 1.337705  | H                      | 2.513247  | -1.635028 | -3.336547 |
| H                       | 4.283196  | 1.621032  | 1.083108  | H                      | 1.297759  | -1.972443 | -2.090135 |
| H                       | 4.787548  | 0.457943  | 2.314767  | H                      | 1.310689  | -0.397230 | -2.912908 |
| H                       | 4.914763  | 0.023332  | 0.609612  | C                      | 2.411154  | 1.827983  | 2.136871  |
| C                       | 3.589179  | -1.273860 | -1.674138 | H                      | 2.470126  | 2.758233  | 1.562479  |
| H                       | 4.087072  | -1.417136 | -2.644003 | H                      | 1.356589  | 1.657574  | 2.371957  |
| H                       | 4.364753  | -1.322358 | -0.902276 | H                      | 2.944146  | 1.970874  | 3.087549  |
| H                       | 2.906146  | -2.121082 | -1.532061 | C                      | 3.905713  | 0.266807  | -2.195435 |
| C                       | 1.912030  | 0.078478  | -2.896302 | H                      | 4.683029  | 0.679378  | -1.547113 |
| H                       | 2.522292  | 0.103514  | -3.810597 | H                      | 4.410597  | -0.304078 | -2.987632 |
| H                       | 1.275040  | -0.810231 | -2.936623 | H                      | 3.374648  | 1.096933  | -2.675245 |
| H                       | 1.261825  | 0.961633  | -2.893942 | N                      | -2.447900 | -0.504938 | 0.414632  |
| C                       | 2.205505  | 0.697125  | 2.623053  | C                      | -3.029294 | 0.678240  | 0.101141  |
| H                       | 2.262066  | 1.784789  | 2.508154  | C                      | -4.417221 | 0.816983  | 0.171257  |
| H                       | 1.149157  | 0.437004  | 2.737112  | H                      | -4.877893 | 1.770923  | -0.064054 |
| H                       | 2.719919  | 0.417484  | 3.553508  | C                      | -5.199113 | -0.262617 | 0.543252  |
| C                       | 3.829009  | 1.221796  | -1.868608 | H                      | -6.279643 | -0.159321 | 0.598965  |
| H                       | 4.587175  | 1.284418  | -1.084513 | C                      | -4.587629 | -1.476515 | 0.840341  |
| H                       | 4.358102  | 1.090631  | -2.823130 | H                      | -5.162908 | -2.351489 | 1.125472  |
| H                       | 3.296821  | 2.179131  | -1.915988 | C                      | -3.207842 | -1.552059 | 0.764220  |
| N                       | -2.543337 | -0.809570 | -0.232833 | H                      | -2.676451 | -2.476910 | 0.972958  |
| C                       | -3.179874 | 0.383740  | -0.151980 | C                      | -0.249192 | -0.151541 | 2.278930  |
| C                       | -4.574502 | 0.439445  | -0.211143 | O                      | -0.336597 | -0.040531 | 3.425435  |
| H                       | -5.079513 | 1.397176  | -0.136747 | N                      | -1.639734 | -2.122883 | -2.292212 |
| C                       | -5.307370 | -0.724832 | -0.359729 | N                      | -1.312867 | -1.006460 | -2.465856 |
| H                       | -6.392453 | -0.683965 | -0.406497 | O                      | -1.550267 | -3.058692 | -1.521101 |
| C                       | -4.638196 | -1.941588 | -0.447985 |                        |           |           |           |
| H                       | -5.170294 | -2.880139 | -0.566979 | <b>2</b>               |           |           |           |
| C                       | -3.256237 | -1.933861 | -0.376851 | SCF done: -1360.732146 |           |           |           |
| H                       | -2.681717 | -2.855198 | -0.434954 | C                      | -0.022293 | 2.319187  | 0.174436  |
| C                       | -0.518354 | -1.104642 | 1.893319  | C                      | 0.468323  | 3.667204  | 0.201180  |
| O                       | -0.670220 | -1.464886 | 2.978544  | C                      | 1.798607  | 3.931820  | 0.056879  |
|                         |           |           |           | C                      | 2.728266  | 2.881209  | -0.108353 |
| <b>TS<sub>1-2</sub></b> |           |           |           | C                      | 2.240577  | 1.593975  | -0.131727 |
| SCF done: -1360.701309  |           |           |           | N                      | 0.915362  | 1.323757  | -0.019451 |
| C                       | 0.157338  | 2.298126  | -0.778457 | H                      | 2.150538  | 4.960716  | 0.075847  |
| C                       | -0.288431 | 3.585958  | -1.230672 | H                      | -0.251370 | 4.469638  | 0.341368  |
| C                       | -1.613660 | 3.908738  | -1.229277 | H                      | 3.788133  | 3.088552  | -0.204826 |
| C                       | -2.579078 | 2.977478  | -0.788511 | Ru                     | 0.291044  | -0.678275 | -0.240132 |
| C                       | -2.126516 | 1.758621  | -0.328394 | H                      | 0.725687  | 0.819663  | 2.106593  |
| N                       | -0.808773 | 1.451789  | -0.273754 | P                      | -1.884643 | 0.307754  | 0.092985  |
| H                       | -1.934287 | 4.885355  | -1.585403 | C                      | -1.357155 | 1.990555  | 0.358361  |

|                         |              |           |           |          |           |           |           |
|-------------------------|--------------|-----------|-----------|----------|-----------|-----------|-----------|
| H                       | -2.088046    | 2.785303  | 0.498259  | H        | 4.989779  | 1.451621  | 1.880772  |
| C                       | -0.352928    | -2.467796 | -0.353832 | H        | 5.054938  | 0.315494  | 0.532105  |
| O                       | -0.767916    | -3.541884 | -0.403464 | C        | 3.673973  | -1.850499 | -0.859960 |
| C                       | -3.009961    | 0.306384  | -1.485890 | H        | 4.121559  | -2.441964 | -1.671330 |
| C                       | -2.915571    | -0.263932 | 1.610640  | H        | 4.489804  | -1.552296 | -0.191981 |
| C                       | -3.035352    | -1.080731 | -2.127747 | H        | 2.998831  | -2.517641 | -0.309030 |
| H                       | -3.743379    | -1.077230 | -2.968657 | C        | 1.945482  | -1.192954 | -2.505570 |
| H                       | -2.058859    | -1.369309 | -2.530987 | H        | 2.513247  | -1.635028 | -3.336547 |
| H                       | -3.356348    | -1.863614 | -1.430648 | H        | 1.297759  | -1.972443 | -2.090135 |
| C                       | -4.443365    | 0.750530  | -1.196744 | H        | 1.310689  | -0.397230 | -2.912908 |
| H                       | -4.475900    | 1.723098  | -0.690716 | C        | 2.411154  | 1.827983  | 2.136871  |
| H                       | -4.969045    | 0.867366  | -2.155330 | H        | 2.470126  | 2.758233  | 1.562479  |
| H                       | -5.010180    | 0.024225  | -0.605340 | H        | 1.356589  | 1.657574  | 2.371957  |
| C                       | -3.582857    | -1.607998 | 1.331706  | H        | 2.944146  | 1.970874  | 3.087549  |
| H                       | -4.094845    | -1.948051 | 2.242822  | C        | 3.905713  | 0.266807  | -2.195435 |
| H                       | -4.335458    | -1.559395 | 0.535836  | H        | 4.683029  | 0.679378  | -1.547113 |
| H                       | -2.847226    | -2.379145 | 1.068472  | H        | 4.410597  | -0.304078 | -2.987632 |
| C                       | -1.958489    | -0.425278 | 2.788864  | H        | 3.374648  | 1.096933  | -2.675245 |
| H                       | -2.546828    | -0.692594 | 3.677676  | N        | -2.447900 | -0.504938 | 0.414632  |
| H                       | -1.213273    | -1.206942 | 2.619165  | C        | -3.029294 | 0.678240  | 0.101141  |
| H                       | -1.430587    | 0.509556  | 3.011319  | C        | -4.417221 | 0.816983  | 0.171257  |
| C                       | -2.429991    | 1.330839  | -2.462954 | H        | -4.877893 | 1.770923  | -0.064054 |
| H                       | -2.587319    | 2.351880  | -2.099952 | C        | -5.199113 | -0.262617 | 0.543252  |
| H                       | -1.358445    | 1.217641  | -2.644330 | H        | -6.279643 | -0.159321 | 0.598965  |
| H                       | -2.942107    | 1.224593  | -3.429755 | C        | -4.587629 | -1.476515 | 0.840341  |
| C                       | -3.948500    | 0.791107  | 2.012974  | H        | -5.162908 | -2.351489 | 1.125472  |
| H                       | -4.770809    | 0.903814  | 1.304240  | C        | -3.207842 | -1.552059 | 0.764220  |
| H                       | -4.388159    | 0.490095  | 2.974116  | H        | -2.676451 | -2.476910 | 0.972958  |
| H                       | -3.477352    | 1.769508  | 2.166096  | C        | -0.249192 | -0.151541 | 2.278930  |
| N                       | 2.472540     | -0.789710 | -0.312385 | O        | -0.336597 | -0.040531 | 3.425435  |
| C                       | 3.102386     | 0.403654  | -0.222920 | N        | -1.639734 | -2.122883 | -2.292212 |
| C                       | 4.496036     | 0.456101  | -0.167112 | N        | -1.312867 | -2.465856 | -2.465856 |
| H                       | 4.998132     | 1.414062  | -0.078358 | O        | -1.550267 | -3.058692 | -1.521101 |
| C                       | 5.227922     | -0.718485 | -0.191689 |          |           |           |           |
| H                       | 6.313064     | -0.683880 | -0.144127 | <b>3</b> |           |           |           |
| C                       | 4.561184     | -1.937966 | -0.256395 | C        | -0.022293 | 2.319187  | 0.174436  |
| H                       | 5.096711     | -2.881800 | -0.256736 | C        | 0.468323  | 3.667204  | 0.201180  |
| C                       | 3.178245     | -1.925126 | -0.308798 | C        | 1.798607  | 3.931820  | 0.056879  |
| H                       | 2.601311     | -2.845781 | -0.340471 | C        | 2.728266  | 2.881209  | -0.108353 |
| C                       | 0.263944     | -0.474841 | -2.109406 | C        | 2.240577  | 1.593975  | -0.131727 |
| O                       | 0.401135     | -0.436012 | -3.256810 | N        | 0.915362  | 1.323757  | -0.019451 |
| N                       | 1.376352     | -0.802938 | 2.743665  | H        | 2.150538  | 4.960716  | 0.075847  |
| N                       | 1.305474     | 0.427806  | 2.875658  | H        | -0.251370 | 4.469638  | 0.341368  |
| O                       | 0.765961     | -1.411988 | 1.741300  | H        | 3.788133  | 3.088552  | -0.204826 |
|                         |              |           |           | Ru       | 0.291044  | -0.678275 | -0.240132 |
|                         |              |           |           | H        | 0.725687  | 0.819663  | 2.106593  |
|                         |              |           |           | P        | -1.884643 | 0.307754  | 0.092985  |
|                         |              |           |           | C        | -1.357155 | 1.990555  | 0.358361  |
|                         |              |           |           | H        | -2.088046 | 2.785303  | 0.498259  |
|                         |              |           |           | C        | -0.352928 | -2.467796 | -0.353832 |
|                         |              |           |           | O        | -0.767916 | -3.541884 | -0.403464 |
|                         |              |           |           | C        | -3.009961 | 0.306384  | -1.485890 |
|                         |              |           |           | C        | -2.915571 | -0.263932 | 1.610640  |
|                         |              |           |           | C        | -3.035352 | -1.080731 | -2.127747 |
|                         |              |           |           | H        | -3.743379 | -1.077230 | -2.968657 |
|                         |              |           |           | H        | -2.058859 | -1.369309 | -2.530987 |
|                         |              |           |           | H        | -3.356348 | -1.863614 | -1.430648 |
|                         |              |           |           | C        | -4.443365 | 0.750530  | -1.196744 |
|                         |              |           |           | H        | -4.475900 | 1.723098  | -0.690716 |
|                         |              |           |           | H        | -4.969045 | 0.867366  | -2.155330 |
|                         |              |           |           | H        | -5.010180 | 0.024225  | -0.605340 |
|                         |              |           |           | C        | -3.582857 | -1.607998 | 1.331706  |
|                         |              |           |           | H        | -4.094845 | -1.948051 | 2.242822  |
|                         |              |           |           | H        | -4.335458 | -1.559395 | 0.535836  |
|                         |              |           |           | H        | -2.847226 | -2.379145 | 1.068472  |
|                         |              |           |           | C        | -1.958489 | -0.425278 | 2.788864  |
|                         |              |           |           | H        | -2.546828 | -0.692594 | 3.677676  |
|                         |              |           |           | H        | -1.213273 | -1.206942 | 2.619165  |
|                         |              |           |           | H        | -1.430587 | 0.509556  | 3.011319  |
|                         |              |           |           | C        | -2.429991 | 1.330839  | -2.462954 |
|                         |              |           |           | H        | -2.587319 | 2.351880  | -2.099952 |
|                         |              |           |           |          |           |           |           |
| <b>TS<sub>2-3</sub></b> |              |           |           |          |           |           |           |
| SCF done:               | -1360.701309 |           |           |          |           |           |           |
| C                       | 0.157338     | 2.298126  | -0.778457 |          |           |           |           |
| C                       | -0.288431    | 3.585958  | -1.230672 |          |           |           |           |
| C                       | -1.613660    | 3.908738  | -1.229277 |          |           |           |           |
| C                       | -2.579078    | 2.977478  | -0.788511 |          |           |           |           |
| C                       | -2.126516    | 1.758621  | -0.328394 |          |           |           |           |
| N                       | -0.808773    | 1.451789  | -0.273754 |          |           |           |           |
| H                       | -1.934287    | 4.885355  | -1.585403 |          |           |           |           |
| H                       | 0.458099     | 4.288567  | -1.592787 |          |           |           |           |
| H                       | -3.636422    | 3.212796  | -0.835451 |          |           |           |           |
| Ru                      | -0.275558    | -0.475442 | 0.376552  |          |           |           |           |
| H                       | -0.474459    | -0.693131 | -1.381418 |          |           |           |           |
| P                       | 1.925095     | 0.307772  | -0.144784 |          |           |           |           |
| C                       | 1.480482     | 1.888650  | -0.840067 |          |           |           |           |
| H                       | 2.240413     | 2.585441  | -1.189891 |          |           |           |           |
| C                       | 0.244076     | -2.286719 | 0.613588  |          |           |           |           |
| O                       | 0.625839     | -3.366595 | 0.772721  |          |           |           |           |
| C                       | 3.053695     | 0.666352  | 1.378216  |          |           |           |           |
| C                       | 2.932320     | -0.662608 | -1.468294 |          |           |           |           |
| C                       | 3.146642     | -0.556376 | 2.289657  |          |           |           |           |
| H                       | 3.804355     | -0.325755 | 3.140079  |          |           |           |           |
| H                       | 2.171176     | -0.837504 | 2.700743  |          |           |           |           |
| H                       | 3.562211     | -1.433124 | 1.781354  |          |           |           |           |
| C                       | 4.457699     | 1.117127  | 0.978517  |          |           |           |           |
| H                       | 4.431514     | 1.966542  | 0.284400  |          |           |           |           |

|                         |           |           |           |                         |           |           |           |
|-------------------------|-----------|-----------|-----------|-------------------------|-----------|-----------|-----------|
| H                       | -1.358445 | 1.217641  | -2.644330 | H                       | -6.281668 | -0.473351 | 0.454528  |
| H                       | -2.942107 | 1.224593  | -3.429755 | C                       | -4.554511 | -1.769065 | 0.470236  |
| C                       | -3.948500 | 0.791107  | -2.012974 | H                       | -5.106163 | -2.696575 | 0.585291  |
| H                       | -4.770809 | 0.903814  | 1.304240  | C                       | -3.173884 | -1.791865 | 0.395606  |
| H                       | -4.388159 | 0.490095  | 2.974116  | H                       | -2.618362 | -2.724798 | 0.445986  |
| H                       | -3.477352 | 1.769508  | 2.166096  | C                       | -0.270085 | -0.646795 | 2.171161  |
| N                       | 2.472540  | -0.789710 | -0.312385 | O                       | -0.377419 | -0.760395 | 3.316312  |
| C                       | 3.102386  | 0.403654  | -0.222920 | N                       | -1.422639 | -1.505375 | -2.815842 |
| C                       | 4.496036  | 0.456101  | -0.167112 | O                       | -1.139696 | -0.290510 | -2.721038 |
| H                       | 4.998132  | 1.414062  | -0.078358 | N                       | -1.267168 | -2.472336 | -2.186838 |
| C                       | 5.227922  | -0.718485 | -0.191689 |                         |           |           |           |
| H                       | 6.313064  | -0.683880 | -0.144127 | <b>TS<sub>1-4</sub></b> |           |           |           |
| C                       | 4.561184  | -1.937966 | -0.256395 | SCF done: -1360.657459  |           |           |           |
| H                       | 5.096711  | -2.881800 | -0.256736 | C                       | -0.126438 | 2.349846  | -0.019429 |
| C                       | 3.178245  | -1.925126 | -0.308798 | C                       | 0.360517  | 3.712676  | 0.033913  |
| H                       | 2.601311  | -2.845781 | -0.340471 | C                       | 1.694473  | 3.993978  | -0.054178 |
| C                       | 0.263944  | -0.474841 | -2.109406 | C                       | 2.645602  | 2.948364  | -0.191609 |
| O                       | 0.401135  | -0.436012 | -3.256810 | C                       | 2.176495  | 1.650491  | -0.260388 |
| N                       | 1.376352  | -0.802938 | 2.743665  | N                       | 0.841539  | 1.353065  | -0.222881 |
| N                       | 1.305474  | 0.427806  | 2.875658  | H                       | 2.037981  | 5.020848  | -0.005535 |
| O                       | 0.765961  | -1.411988 | 1.741300  | H                       | -0.369948 | 4.501799  | 0.159120  |
|                         |           |           |           | H                       | 3.701936  | 3.168836  | -0.220664 |
|                         |           |           |           | Ru                      | 0.324295  | -0.651882 | -1.280454 |
| <b>TS<sub>1-3</sub></b> |           |           |           | H                       | 0.652010  | -0.591155 | 0.444990  |
| SCF done: -1360.680295  |           |           |           | P                       | -1.937332 | 0.261736  | 0.014580  |
| C                       | 0.097959  | 2.367740  | -0.319428 | C                       | -1.458178 | 2.020766  | 0.114625  |
| C                       | -0.376991 | 3.709188  | -0.505982 | C                       | -2.202092 | 2.793363  | 0.256561  |
| C                       | -1.711310 | 3.992184  | -0.465470 | H                       | -0.175683 | -2.472123 | 0.062896  |
| C                       | -2.655853 | 2.967611  | -0.241862 | O                       | -0.522027 | -3.555326 | 0.350237  |
| C                       | -2.175278 | 1.691591  | -0.028953 | C                       | -3.170850 | 0.125899  | -1.524008 |
| N                       | -0.850735 | 1.411835  | -0.017278 | C                       | -2.902061 | -0.189332 | 1.674283  |
| H                       | -2.053795 | 5.012910  | -0.621128 | C                       | -3.309993 | -1.345682 | -1.974764 |
| H                       | 0.355558  | 4.488683  | -0.700549 | H                       | -3.939380 | -1.383331 | -2.873751 |
| H                       | -3.718676 | 3.181661  | -0.258834 | H                       | -2.335014 | -1.774729 | -2.224496 |
| Ru                      | -0.267868 | -0.599632 | 0.243273  | H                       | -3.776888 | -1.967598 | -1.206260 |
| H                       | -0.468961 | -0.260575 | -1.577049 | C                       | -4.565422 | 0.715937  | -1.212699 |
| P                       | 1.911851  | 0.329731  | -0.074210 | H                       | -4.490273 | 1.756806  | -0.880304 |
| C                       | 1.431300  | 2.008144  | -0.443519 | H                       | -5.161948 | 0.698535  | -2.134642 |
| H                       | 2.176834  | 2.778099  | -0.634288 | H                       | -5.099724 | 0.137582  | -0.455987 |
| C                       | 0.303482  | -2.403493 | 0.114345  | C                       | -3.706527 | -1.498967 | 1.520419  |
| O                       | 0.709811  | -3.487071 | 0.070653  | H                       | -4.127592 | -1.763043 | 2.499574  |
| C                       | 3.009497  | 0.397581  | 1.516006  | H                       | -4.534967 | -1.398049 | 0.814625  |
| C                       | 2.985057  | -0.311140 | -1.539571 | H                       | -3.061780 | -2.325181 | 1.199225  |
| C                       | 3.113195  | -0.982238 | 2.163925  | C                       | -1.844634 | -0.392108 | 2.783837  |
| H                       | 3.768805  | -0.922049 | 3.044563  | H                       | -2.369747 | -0.468101 | 3.746368  |
| H                       | 2.140695  | -1.349546 | 2.507556  | H                       | -1.291230 | -1.320870 | 2.625562  |
| H                       | 3.534742  | -1.735343 | 1.489547  | H                       | -1.129681 | 0.430715  | 2.831174  |
| C                       | 4.411347  | 0.944781  | 1.247901  | C                       | -2.560729 | 0.961450  | -2.673575 |
| H                       | 4.380170  | 1.908073  | 0.723291  | H                       | -2.418369 | 2.000646  | -2.365287 |
| H                       | 4.910622  | 1.116907  | 2.212510  | H                       | -1.598233 | 0.566564  | -3.001052 |
| H                       | 5.043713  | 0.255088  | 0.678977  | H                       | -3.248759 | 0.928553  | -3.528565 |
| C                       | 3.741210  | -1.586926 | -1.177032 | C                       | -3.823969 | 0.977530  | 2.098372  |
| H                       | 4.233586  | -1.976539 | -2.079389 | H                       | -4.617176 | 1.170998  | 1.373672  |
| H                       | 4.523779  | -1.423431 | -0.428643 | H                       | -4.291977 | 0.716642  | 3.056690  |
| H                       | 3.069122  | -2.373056 | -0.810762 | H                       | -3.237430 | 1.890334  | 2.241805  |
| C                       | 2.045807  | -0.626206 | -2.701285 | N                       | 2.439129  | -0.746791 | -0.333031 |
| H                       | 2.651646  | -0.898755 | -3.577299 | C                       | 3.059975  | 0.476487  | -0.342309 |
| H                       | 1.384838  | -1.470092 | -2.475802 | C                       | 4.457635  | 0.545504  | -0.398476 |
| H                       | 1.428427  | 0.237210  | -2.973198 | H                       | 4.941082  | 1.511397  | -0.410481 |
| C                       | 2.334947  | 1.375000  | 2.480676  | C                       | 5.213818  | -0.619611 | -0.431166 |
| H                       | 2.397346  | 2.403366  | 2.109374  | H                       | 6.294615  | -0.565818 | -0.471109 |
| H                       | 1.277259  | 1.157018  | 2.655069  | C                       | 4.565694  | -1.858810 | -0.406298 |
| H                       | 2.847271  | 1.324758  | 3.451967  | H                       | 5.120033  | -2.787313 | -0.421272 |
| C                       | 3.952430  | 0.772413  | -2.019592 | C                       | 3.179719  | -1.882738 | -0.357864 |
| H                       | 4.718214  | 1.030646  | -1.284127 | H                       | 2.628796  | -2.811679 | -0.335659 |
| H                       | 4.471162  | 0.407634  | -2.917424 | C                       | 0.246384  | -0.855726 | -2.225200 |
| H                       | 3.413309  | 1.685138  | -2.298848 | O                       | 0.315855  | -1.088837 | -3.370207 |
| N                       | -2.438480 | -0.680292 | 0.249662  | N                       | 1.307815  | -0.453718 | 2.518389  |
| C                       | -3.050831 | 0.525945  | 0.164404  | O                       | 1.108194  | 0.812842  | 2.739628  |
| C                       | -4.443322 | 0.612004  | 0.241983  | N                       | 1.813844  | -1.454537 | 2.862987  |
| H                       | -4.927156 | 1.581677  | 0.183970  |                         |           |           |           |
| C                       | -5.198356 | -0.536999 | 0.394551  |                         |           |           |           |

|                         |              |           |           |           |              |           |           |
|-------------------------|--------------|-----------|-----------|-----------|--------------|-----------|-----------|
| <b>4</b>                |              |           |           | Ru        | -0.342653    | -0.660617 | 0.138369  |
| SCF done:               | -1360.699354 |           |           | H         | -1.115693    | -2.006112 | -2.127822 |
| C                       | 0.180599     | 2.364177  | -0.401002 | P         | 1.837884     | 0.309227  | 0.052840  |
| C                       | -0.256004    | 3.704066  | -0.676084 | C         | 1.383327     | 2.017524  | 0.332531  |
| C                       | -1.581414    | 4.022230  | -0.660605 | H         | 2.139348     | 2.792273  | 0.450046  |
| C                       | -2.552881    | 3.035962  | -0.382413 | C         | 0.068629     | -2.479819 | -0.360411 |
| C                       | -2.109632    | 1.767274  | -0.079991 | O         | 0.298919     | -3.631084 | -0.389895 |
| N                       | -0.789883    | 1.466235  | -0.012817 | C         | 3.109285     | -0.241664 | 1.379553  |
| H                       | -1.897462    | 5.038863  | -0.884016 | C         | 2.611550     | 0.263009  | -1.710932 |
| H                       | 0.497469     | 4.447721  | -0.923103 | C         | 3.021360     | -1.759387 | 1.547338  |
| H                       | -3.609119    | 3.276210  | -0.422113 | H         | 3.789945     | -2.088232 | 2.261369  |
| Ru                      | -0.295899    | -0.542577 | 0.280520  | H         | 2.046927     | -2.074046 | 1.936809  |
| H                       | -0.820628    | -2.461995 | -2.277627 | H         | 3.189131     | -2.297182 | 0.605924  |
| P                       | 1.936321     | 0.286848  | -0.130396 | C         | 4.548035     | 0.143722  | 1.043062  |
| C                       | 1.504120     | 1.965950  | -0.519748 | H         | 4.658941     | 1.220797  | 0.865366  |
| H                       | 2.265589     | 2.703028  | -0.765944 | H         | 5.185902     | -0.113571 | 1.900707  |
| C                       | 0.239980     | -2.365356 | 0.312396  | H         | 4.937940     | -0.399494 | 0.175710  |
| O                       | 0.616739     | -3.459134 | 0.309839  | C         | 3.061229     | -1.146592 | -2.082993 |
| C                       | 3.064568     | 0.338493  | 1.440047  | H         | 3.448127     | -1.140808 | -3.112631 |
| C                       | 2.939093     | -0.439239 | -1.602174 | H         | 3.870414     | -1.512561 | -1.437692 |
| C                       | 3.110501     | -1.021988 | 2.134708  | H         | 2.230272     | -1.860672 | -2.049429 |
| H                       | 3.784980     | -0.962994 | 3.000908  | C         | 1.506178     | 0.725739  | -2.665149 |
| H                       | 2.129850     | -1.332473 | 2.511143  | H         | 1.916447     | 0.746444  | -3.684995 |
| H                       | 3.487083     | -1.816163 | 1.480522  | H         | 0.648881     | 0.047603  | -2.661380 |
| C                       | 4.489380     | 0.793952  | 1.123223  | H         | 1.171183     | 1.740140  | -2.417648 |
| H                       | 4.499676     | 1.744942  | 0.576262  | C         | 2.748618     | 0.448322  | 2.695581  |
| H                       | 5.021012     | 0.960397  | 2.071239  | H         | 2.874521     | 1.534312  | 2.626816  |
| H                       | 5.065624     | 0.054682  | 0.557574  | H         | 1.724371     | 0.251983  | 3.021115  |
| C                       | 3.644034     | -1.739253 | -1.223066 | H         | 3.421410     | 0.072335  | 3.479815  |
| H                       | 4.098025     | -2.172011 | -2.125909 | C         | 3.767442     | 1.254507  | -1.859625 |
| H                       | 4.449008     | -1.597145 | -0.494182 | H         | 4.692785     | 0.925542  | -1.382666 |
| H                       | 2.943885     | -2.484666 | -0.824598 | H         | 3.983681     | 1.371947  | -2.931001 |
| C                       | 1.965206     | -0.733811 | -2.742042 | H         | 3.503027     | 2.246253  | -1.472162 |
| H                       | 2.550200     | -0.995934 | -3.635339 | N         | -2.518832    | -0.719419 | -0.034278 |
| H                       | 1.303399     | -1.572484 | -2.508450 | C         | -3.104382    | 0.497217  | -0.164036 |
| H                       | 1.325632     | 0.122910  | -2.976290 | C         | -4.483476    | 0.587301  | -0.371475 |
| C                       | 2.475420     | 1.392407  | 2.381024  | H         | -4.946623    | 1.560999  | -0.495832 |
| H                       | 2.607344     | 2.399819  | 1.972988  | C         | -5.251313    | -0.562694 | -0.429985 |
| H                       | 1.408098     | 1.264741  | 2.579516  | H         | -6.323950    | -0.493066 | -0.591333 |
| H                       | 2.999523     | 1.336944  | 3.345624  | C         | -4.636555    | -1.802749 | -0.281103 |
| C                       | 3.945550     | 0.588281  | -2.125999 | H         | -5.201275    | -2.728986 | -0.315575 |
| H                       | 4.738367     | 0.834361  | -1.415267 | C         | -3.266461    | -1.830481 | -0.086924 |
| H                       | 4.429026     | 0.174054  | -3.021961 | H         | -2.730019    | -2.769885 | 0.037248  |
| H                       | 3.440175     | 1.514024  | -2.424496 | C         | -0.336623    | -0.703528 | 1.958330  |
| N                       | -2.456003    | -0.547337 | 0.473154  | O         | -0.402490    | -0.840817 | 3.112434  |
| C                       | -3.024004    | 0.643401  | 0.180695  | O         | -0.236654    | -1.704641 | -1.860370 |
| C                       | -4.413300    | 0.753988  | 0.119531  |           |              |           |           |
| H                       | -4.871252    | 1.704825  | -0.131841 | <b>5</b>  |              |           |           |
| C                       | -5.204246    | -0.354970 | 0.366107  | SCF done: | -1251.375202 |           |           |
| H                       | -6.286536    | -0.273259 | 0.311398  | C         | 0.021849     | 2.344404  | 0.316671  |
| C                       | -4.602241    | -1.567530 | 0.680043  | C         | 0.540177     | 3.679240  | 0.468250  |
| H                       | -5.183826    | -2.462064 | 0.876963  | C         | 1.875352     | 3.926160  | 0.363761  |
| C                       | -3.220090    | -1.616517 | 0.715846  | C         | 2.793848     | 2.874078  | 0.115223  |
| H                       | -2.692805    | -2.542653 | 0.934325  | C         | 2.288834     | 1.599651  | 0.008034  |
| C                       | -0.189648    | -0.447121 | 2.161213  | N         | 0.958006     | 1.333581  | 0.122784  |
| O                       | -0.288340    | -0.458031 | 3.313395  | H         | 2.246679     | 4.943319  | 0.468177  |
| N                       | -1.529447    | -1.700356 | -2.136016 | H         | -0.166079    | 4.485331  | 0.651412  |
| O                       | -0.807224    | -0.565610 | -1.745725 | H         | 3.853964     | 3.079300  | 0.014482  |
| N                       | -2.697085    | -1.786713 | -2.324974 | Ru        | 0.312616     | -0.648297 | -0.237510 |
|                         |              |           |           | H         | 0.976709     | 0.519633  | 2.010640  |
| <b>TS<sub>3-5</sub></b> |              |           |           | P         | -1.808324    | 0.342481  | -0.031530 |
| SCF done:               | -1251.343261 |           |           | C         | -1.322455    | 2.030481  | 0.353963  |
| C                       | 0.049941     | 2.370286  | 0.198506  | H         | -2.054928    | 2.814608  | 0.538181  |
| C                       | -0.422432    | 3.727544  | 0.220588  | C         | 0.432654     | -1.268979 | 1.659273  |
| C                       | -1.752098    | 4.007980  | 0.098012  | O         | 0.193088     | -2.371456 | 2.081918  |
| C                       | -2.699525    | 2.969385  | -0.047105 | C         | -2.564760    | 0.420204  | -1.795995 |
| C                       | -2.221291    | 1.674635  | -0.069295 | C         | -3.088530    | -0.229527 | 1.256864  |
| N                       | -0.905184    | 1.387285  | 0.027151  | C         | -3.259089    | -0.881511 | -2.181291 |
| H                       | -2.090354    | 5.041765  | 0.119804  | H         | -3.530159    | -0.845125 | -3.246591 |
| H                       | 0.308266     | 4.523524  | 0.342664  | H         | -2.616518    | -1.758539 | -2.035152 |
| H                       | -3.758976    | 3.192080  | -0.109905 | H         | -4.186175    | -1.039858 | -1.618265 |

|   |           |           |           |                        |           |           |           |
|---|-----------|-----------|-----------|------------------------|-----------|-----------|-----------|
| C | -3.512235 | 1.601652  | -1.983348 | H                      | -1.014750 | 1.493077  | -2.514036 |
| H | -3.024853 | 2.547678  | -1.720490 | H                      | -0.822491 | -0.267201 | -2.713548 |
| H | -3.809302 | 1.660283  | -3.040736 | H                      | -1.968275 | 0.626931  | -3.736117 |
| H | -4.428805 | 1.509549  | -1.391988 | C                      | -4.435003 | 0.290139  | 1.218411  |
| C | -3.234581 | -1.750238 | 1.196182  | H                      | -4.964094 | -0.157865 | 0.369328  |
| H | -3.977291 | -2.065580 | 1.943060  | H                      | -5.012759 | 0.048642  | 2.122080  |
| H | -3.582700 | -2.106632 | 0.219897  | H                      | -4.451825 | 1.382180  | 1.104915  |
| H | -2.289638 | -2.252838 | 1.434410  | N                      | 2.466178  | -0.752039 | -0.345347 |
| C | -2.550314 | 0.159010  | 2.635194  | C                      | 3.099977  | 0.440732  | -0.199990 |
| H | -3.262256 | -0.189883 | 3.396614  | C                      | 4.491195  | 0.512487  | -0.144666 |
| H | -1.583304 | -0.304343 | 2.856505  | H                      | 4.972885  | 1.473890  | 0.009410  |
| H | -2.441008 | 1.244446  | 2.739333  | C                      | 5.240495  | -0.649641 | -0.246551 |
| C | -1.352954 | 0.634035  | -2.711194 | H                      | 6.325397  | -0.606653 | -0.201728 |
| H | -0.796201 | 1.539386  | -2.438289 | C                      | 4.583002  | -1.867682 | -0.375396 |
| H | -0.665261 | -0.226949 | -2.693704 | H                      | 5.127903  | -2.804684 | -0.433229 |
| H | -1.691839 | 0.751429  | -3.750959 | C                      | 3.197032  | -1.873122 | -0.410302 |
| C | -4.441874 | 0.448787  | 1.059724  | H                      | 2.632182  | -2.799381 | -0.484420 |
| H | -4.949550 | 0.121058  | 0.145256  | C                      | -0.264360 | -2.382298 | -0.680547 |
| H | -5.096191 | 0.188622  | 1.904002  | O                      | -0.642728 | -3.449847 | -0.960046 |
| H | -4.355669 | 1.543175  | 1.038497  | O                      | 0.945382  | -0.160205 | 2.390062  |
| N | 2.471965  | -0.769491 | -0.387537 |                        |           |           |           |
| C | 3.128285  | 0.405923  | -0.211496 |                        |           |           |           |
| C | 4.522651  | 0.444275  | -0.220492 | <b>6</b>               |           |           |           |
| H | 5.037510  | 1.387845  | -0.068856 | SCF done: -1062.823807 |           |           |           |
| C | 5.242894  | -0.724935 | -0.402598 | C                      | -0.027897 | 2.279685  | -0.337336 |
| H | 6.329381  | -0.701019 | -0.407208 | C                      | -0.548166 | 3.619870  | -0.270251 |
| C | 4.559231  | -1.925495 | -0.563006 | C                      | -1.871238 | 3.844998  | -0.060720 |
| H | 5.082239  | -2.867571 | -0.693462 | C                      | -2.798160 | 2.763324  | 0.080101  |
| C | 3.174905  | -1.900430 | -0.544380 | C                      | -2.370218 | 1.487306  | -0.114529 |
| H | 2.589347  | -2.810727 | -0.650658 | N                      | -1.018086 | 1.248503  | -0.419404 |
| C | -0.266536 | -2.362614 | -0.707086 | H                      | -2.237715 | 4.864039  | 0.034986  |
| O | -0.605346 | -3.427233 | -1.026859 | H                      | 0.161552  | 4.441577  | -0.327190 |
| O | 0.890724  | -0.310360 | 2.507320  | H                      | -3.825109 | 2.961733  | 0.370815  |
|   |           |           |           | Ru                     | -0.385603 | -0.790991 | 0.058879  |
|   |           |           |           | H                      | -0.892181 | 0.665528  | -1.298786 |
|   |           |           |           | P                      | 1.729684  | 0.157149  | -0.058459 |
|   |           |           |           | C                      | 1.282581  | 1.916349  | -0.343515 |
|   |           |           |           | H                      | 2.035201  | 2.700662  | -0.427454 |
|   |           |           |           | C                      | 2.647178  | 0.241329  | 1.626453  |
|   |           |           |           | C                      | 2.929161  | -0.277583 | -1.486118 |
|   |           |           |           | C                      | 3.389967  | -1.068629 | 1.875610  |
|   |           |           |           | H                      | 3.727454  | -1.100000 | 2.921848  |
|   |           |           |           | H                      | 2.749538  | -1.943839 | 1.705712  |
|   |           |           |           | H                      | 4.281869  | -1.162883 | 1.244145  |
|   |           |           |           | C                      | 3.601514  | 1.422417  | 1.774243  |
|   |           |           |           | H                      | 3.077112  | 2.380392  | 1.680329  |
|   |           |           |           | H                      | 4.052214  | 1.393500  | 2.777282  |
|   |           |           |           | H                      | 4.421213  | 1.405186  | 1.050036  |
|   |           |           |           | C                      | 3.190314  | -1.783223 | -1.490655 |
|   |           |           |           | H                      | 3.813833  | -2.035959 | -2.360485 |
|   |           |           |           | H                      | 3.720253  | -2.125819 | -0.595481 |
|   |           |           |           | H                      | 2.257141  | -2.352134 | -1.567598 |
|   |           |           |           | C                      | 2.177717  | 0.080550  | -2.768749 |
|   |           |           |           | H                      | 2.762042  | -0.255984 | -3.637222 |
|   |           |           |           | H                      | 1.198461  | -0.416064 | -2.800493 |
|   |           |           |           | H                      | 2.017886  | 1.161735  | -2.863033 |
|   |           |           |           | C                      | 1.534266  | 0.388939  | 2.667665  |
|   |           |           |           | H                      | 0.931338  | 1.288437  | 2.486189  |
|   |           |           |           | H                      | 0.860720  | -0.477425 | 2.662719  |
|   |           |           |           | H                      | 1.982933  | 0.479825  | 3.668378  |
|   |           |           |           | C                      | 4.250842  | 0.482237  | -1.448440 |
|   |           |           |           | H                      | 4.883530  | 0.175318  | -0.606904 |
|   |           |           |           | H                      | 4.814737  | 0.271315  | -2.369018 |
|   |           |           |           | H                      | 4.107689  | 1.569635  | -1.397888 |
|   |           |           |           | N                      | -2.513127 | -0.910056 | -0.003720 |
|   |           |           |           | C                      | -3.187735 | 0.274935  | -0.054864 |
|   |           |           |           | C                      | -4.583166 | 0.317176  | -0.077948 |
|   |           |           |           | H                      | -5.087741 | 1.275994  | -0.159515 |
|   |           |           |           | C                      | -5.308201 | -0.859707 | -0.013836 |
|   |           |           |           | H                      | -6.394395 | -0.838943 | -0.028772 |
|   |           |           |           | C                      | -4.616148 | -2.067595 | 0.054944  |
|   |           |           |           | H                      | -5.138594 | -3.018358 | 0.102140  |

  

**TS<sub>5-6</sub>**  
SCF done: -1251.342199

|    |           |           |           |
|----|-----------|-----------|-----------|
| C  | -0.068033 | 2.372837  | 0.275308  |
| C  | 0.413188  | 3.732667  | 0.180778  |
| C  | 1.703830  | 3.978075  | -0.146399 |
| C  | 2.632776  | 2.901680  | -0.364146 |
| C  | 2.246637  | 1.633515  | -0.086485 |
| N  | 0.939606  | 1.368021  | 0.358397  |
| H  | 2.045926  | 5.001340  | -0.279739 |
| H  | -0.304304 | 4.541055  | 0.299032  |
| H  | 3.623355  | 3.106646  | -0.759131 |
| Ru | 0.304924  | -0.692560 | -0.229994 |
| H  | 0.955289  | 0.867988  | 1.356576  |
| P  | -1.822076 | 0.247378  | -0.011362 |
| C  | -1.374432 | 2.002181  | 0.279999  |
| H  | -2.138077 | 2.774979  | 0.375768  |
| C  | 0.611314  | -1.216830 | 1.773771  |
| O  | 0.502152  | -2.375762 | 2.109600  |
| C  | -2.686202 | 0.321361  | -1.720524 |
| C  | -3.019152 | -0.252130 | 1.386357  |
| C  | -3.351314 | -1.017381 | -2.029156 |
| H  | -3.716218 | -1.007348 | -3.066183 |
| H  | -2.655262 | -1.859444 | -1.934004 |
| H  | -4.214420 | -1.211476 | -1.382126 |
| C  | -3.694404 | 1.457716  | -1.863333 |
| H  | -3.230849 | 2.436547  | -1.693307 |
| H  | -4.087557 | 1.457849  | -2.890313 |
| H  | -4.548174 | 1.356086  | -1.188253 |
| C  | -3.036197 | -1.780343 | 1.459114  |
| H  | -3.740270 | -2.092823 | 2.243295  |
| H  | -3.358575 | -2.245530 | 0.519395  |
| H  | -2.047374 | -2.180641 | 1.712590  |
| C  | -2.437422 | 0.307079  | 2.687091  |
| H  | -3.007230 | -0.107219 | 3.530682  |
| H  | -1.383617 | 0.044920  | 2.833755  |
| H  | -2.521562 | 1.399774  | 2.729078  |
| C  | -1.550191 | 0.557261  | -2.721329 |

|   |           |           |          |    |           |           |           |
|---|-----------|-----------|----------|----|-----------|-----------|-----------|
| C | -3.233372 | -2.047090 | 0.051012 | H  | -1.875429 | 4.787256  | -1.563679 |
| H | -2.652315 | -2.964323 | 0.091099 | H  | 0.511815  | 4.279825  | -1.189210 |
| C | 0.166530  | -2.533780 | 0.176221 | H  | -3.605298 | 3.031744  | -1.125229 |
| O | 0.544562  | -3.644368 | 0.232064 | Ru | -0.360616 | -0.564511 | 0.481165  |

**TS<sub>5-7</sub>**

SCF done: -1251.318684

|    |           |           |           |
|----|-----------|-----------|-----------|
| C  | 0.094599  | 2.361227  | -0.122284 |
| C  | -0.391559 | 3.711822  | -0.145558 |
| C  | -1.722274 | 3.974712  | -0.005236 |
| C  | -2.650269 | 2.922737  | 0.173096  |
| C  | -2.164874 | 1.634229  | 0.162845  |
| N  | -0.848498 | 1.356889  | -0.012939 |
| H  | -2.074812 | 5.003748  | -0.016591 |
| H  | 0.330834  | 4.515934  | -0.261471 |
| H  | -3.703904 | 3.133385  | 0.319976  |
| Ru | -0.284791 | -0.665688 | -0.047506 |
| H  | 0.679364  | -0.560113 | -1.479343 |
| P  | 1.880954  | 0.315848  | -0.002901 |
| C  | -0.950934 | -0.940968 | -2.070785 |
| O  | 0.096741  | -0.728704 | -2.745911 |
| C  | 2.440297  | 0.046095  | 1.825364  |
| C  | 3.298838  | -0.093135 | -1.218171 |
| C  | 3.021941  | -1.343401 | 2.059228  |
| H  | 3.217830  | -1.472819 | 3.133640  |
| H  | 2.335009  | -2.141445 | 1.753392  |
| H  | 3.974454  | -1.493884 | 1.538571  |
| C  | 3.427250  | 1.124523  | 2.268625  |
| H  | 3.038680  | 2.127923  | 2.057126  |
| H  | 3.572692  | 1.044322  | 3.355657  |
| H  | 4.410648  | 1.025124  | 1.802436  |
| C  | 3.028831  | 0.666137  | -2.520128 |
| H  | 3.766660  | 0.338692  | -3.266488 |
| H  | 2.032676  | 0.474852  | -2.928404 |
| H  | 3.139659  | 1.747519  | -2.386206 |
| C  | 4.667741  | 0.339817  | -0.696698 |
| H  | 5.406015  | 0.194105  | -1.497769 |
| H  | 4.690484  | 1.402418  | -0.422988 |
| H  | 5.003655  | -0.251594 | 0.162379  |
| C  | 1.169760  | 0.211796  | 2.664921  |
| H  | 0.701495  | 1.189076  | 2.497359  |
| H  | 0.427301  | -0.573600 | 2.457876  |
| H  | 1.431921  | 0.142677  | 3.730761  |
| C  | 3.301218  | -1.597460 | -1.494352 |
| H  | 2.389517  | -1.916858 | -2.012307 |
| H  | 4.153858  | -1.839919 | -2.143982 |
| H  | 3.401404  | -2.194279 | -0.579992 |
| C  | -3.016619 | 0.450010  | 0.368847  |
| C  | -5.133757 | -0.656704 | 0.629624  |
| H  | -6.219038 | -0.619990 | 0.675633  |
| C  | -4.460539 | -1.866998 | 0.754585  |
| H  | -4.990136 | -2.803044 | 0.899931  |
| C  | -3.079236 | -1.858210 | 0.670860  |
| H  | -2.503537 | -2.778120 | 0.735571  |
| O  | -2.101390 | -1.205495 | -2.289539 |
| C  | 0.218048  | -2.468165 | 0.048499  |
| O  | 0.538886  | -3.580538 | 0.161031  |
| C  | 1.439749  | 2.031521  | -0.184096 |
| H  | 2.194141  | 2.806559  | -0.298764 |
| N  | -2.372187 | -0.735243 | 0.495830  |
| C  | -4.408136 | 0.506334  | 0.432656  |
| H  | -4.917469 | 1.456831  | 0.309390  |

**TS<sub>5-7</sub>**

SCF done: -1251.272783

|   |           |          |           |
|---|-----------|----------|-----------|
| C | 0.170576  | 2.240069 | -0.540713 |
| C | -0.252754 | 3.529193 | -1.005213 |
| C | -1.573467 | 3.804062 | -1.209862 |
| C | -2.553631 | 2.819287 | -0.967499 |
| C | -2.130083 | 1.583768 | -0.523573 |
| N | -0.816339 | 1.300722 | -0.322955 |

|    |           |           |           |
|----|-----------|-----------|-----------|
| H  | -1.875429 | 4.787256  | -1.563679 |
| H  | 0.511815  | 4.279825  | -1.189210 |
| H  | -3.605298 | 3.031744  | -1.125229 |
| Ru | -0.360616 | -0.564511 | 0.481165  |
| H  | 0.729807  | -1.730593 | 0.963767  |
| P  | 1.872879  | 0.198357  | 0.040986  |
| C  | 1.492532  | 1.905592  | -0.305201 |
| H  | 2.276348  | 2.628380  | -0.519101 |
| C  | -0.327952 | -2.145366 | -0.789604 |
| O  | -0.526450 | -2.686987 | -1.841855 |
| C  | 3.162737  | 0.212771  | 1.464290  |
| C  | 2.670329  | -0.533753 | -1.557531 |
| C  | 3.903889  | -1.115722 | 1.578664  |
| H  | 4.485033  | -1.121740 | 2.511660  |
| H  | 3.218867  | -1.973759 | 1.616226  |
| H  | 4.610108  | -1.274722 | 0.757023  |
| C  | 4.159814  | 1.359261  | 1.278950  |
| H  | 3.655340  | 2.330815  | 1.323849  |
| H  | 4.889455  | 1.325135  | 2.100179  |
| H  | 4.719154  | 1.304382  | 0.341262  |
| C  | 2.908678  | -2.040591 | -1.476751 |
| H  | 3.196622  | -2.403074 | -2.473602 |
| H  | 3.718655  | -2.304946 | -0.790320 |
| H  | 2.016018  | -2.602732 | -1.185647 |
| C  | 1.683449  | -0.237125 | -2.690649 |
| H  | 2.122950  | -0.594136 | -3.632695 |
| H  | 0.725815  | -0.750379 | -2.561682 |
| H  | 1.497454  | 0.838477  | -2.787933 |
| C  | 2.422286  | 0.467728  | 2.774747  |
| H  | 1.770523  | 1.347294  | 2.711091  |
| H  | 1.823624  | -0.396073 | 3.082735  |
| H  | 3.161050  | 0.654308  | 3.566891  |
| C  | 3.986503  | 0.170228  | -1.888500 |
| H  | 4.795870  | -0.085913 | -1.194960 |
| H  | 4.312150  | -0.147032 | -2.889435 |
| H  | 3.874580  | 1.261700  | -1.914758 |
| N  | -2.490250 | -0.649489 | 0.248302  |
| C  | -3.054799 | 0.481037  | -0.232321 |
| C  | -4.437147 | 0.540432  | -0.419016 |
| H  | -4.893206 | 1.444913  | -0.808937 |
| C  | -5.217823 | -0.561167 | -0.110926 |
| H  | -6.294345 | -0.521026 | -0.254797 |
| C  | -4.613384 | -1.717278 | 0.375752  |
| H  | -5.191415 | -2.602656 | 0.620255  |
| C  | -3.239163 | -1.719365 | 0.537608  |
| H  | -2.693568 | -2.592271 | 0.894498  |
| C  | -0.594762 | 0.162750  | 2.327195  |
| O  | -0.871185 | 0.349051  | 3.431193  |
| O  | -0.134965 | -2.717752 | 0.422399  |

**TS<sub>6-7</sub>**

SCF done: -1062.820635

|    |           |           |           |
|----|-----------|-----------|-----------|
| C  | -0.001200 | 2.250579  | -0.364735 |
| C  | -0.509982 | 3.592216  | -0.469837 |
| C  | -1.843018 | 3.847603  | -0.391249 |
| C  | -2.785112 | 2.793117  | -0.212530 |
| C  | -2.330231 | 1.505476  | -0.176319 |
| N  | -0.978626 | 1.231539  | -0.305550 |
| H  | -2.201800 | 4.872421  | -0.449100 |
| H  | 0.211457  | 4.398708  | -0.575971 |
| H  | -3.838916 | 3.016467  | -0.082200 |
| Ru | -0.370276 | -0.771260 | 0.130111  |
| H  | -0.735941 | 0.356830  | -1.145694 |
| P  | 1.760616  | 0.163127  | -0.002143 |
| C  | 1.320219  | 1.898161  | -0.338502 |
| H  | 2.071623  | 2.672703  | -0.488081 |
| C  | 2.635042  | 0.241040  | 1.704465  |
| C  | 2.969552  | -0.324997 | -1.400710 |
| C  | 3.325738  | -1.082212 | 2.019333  |
| H  | 3.600976  | -1.103364 | 3.083956  |
| H  | 2.671719  | -1.942593 | 1.825256  |

|   |           |           |           |
|---|-----------|-----------|-----------|
| H | 4.250242  | -1.212768 | 1.444565  |
| C | 3.619109  | 1.397906  | 1.844207  |
| H | 3.127960  | 2.364506  | 1.682765  |
| H | 4.028533  | 1.401030  | 2.865345  |
| H | 4.465405  | 1.322706  | 1.154453  |
| C | 3.306976  | -1.812942 | -1.322668 |
| H | 3.913244  | -2.086550 | -2.198413 |
| H | 3.888777  | -2.068558 | -0.431057 |
| H | 2.407596  | -2.438524 | -1.331434 |
| C | 2.200583  | -0.075564 | -2.699529 |
| H | 2.811861  | -0.411183 | -3.549633 |
| H | 1.256304  | -0.634964 | -2.711761 |
| H | 1.970375  | 0.987326  | -2.840865 |
| C | 1.495360  | 0.454857  | 2.705743  |
| H | 0.919118  | 1.359794  | 2.473117  |
| H | 0.805120  | -0.399573 | 2.718968  |
| H | 1.915272  | 0.572425  | 3.716041  |
| C | 4.253820  | 0.498376  | -1.410614 |
| H | 4.913697  | 0.247185  | -0.571893 |
| H | 4.812208  | 0.284698  | -2.333826 |
| H | 4.060304  | 1.578640  | -1.389410 |
| N | -2.514269 | -0.872330 | 0.131234  |
| C | -3.169420 | 0.311291  | -0.019768 |
| C | -4.563962 | 0.364076  | -0.049392 |
| H | -5.062624 | 1.317966  | -0.194114 |
| C | -5.301045 | -0.798722 | 0.093292  |
| H | -6.386988 | -0.766252 | 0.073429  |
| C | -4.625410 | -2.005996 | 0.249805  |
| H | -5.157734 | -2.946199 | 0.357132  |
| C | -3.241905 | -1.996101 | 0.257925  |
| H | -2.670923 | -2.914773 | 0.363330  |
| C | 0.131358  | -2.542529 | -0.023806 |
| O | 0.438181  | -3.663320 | -0.178226 |

7

SCF done: -1062.871535

|    |           |           |           |
|----|-----------|-----------|-----------|
| C  | -0.099975 | 2.271412  | -0.027553 |
| C  | -0.629728 | 3.609196  | -0.023204 |
| C  | -1.974037 | 3.828036  | -0.013626 |
| C  | -2.882556 | 2.741786  | -0.008259 |
| C  | -2.354123 | 1.469397  | -0.009171 |
| N  | -1.019280 | 1.233878  | -0.008275 |
| H  | -2.357576 | 4.846278  | -0.012384 |
| H  | 0.073049  | 4.438924  | -0.031753 |
| H  | -3.952458 | 2.918590  | -0.004077 |
| Ru | -0.362809 | -0.758873 | -0.012375 |
| H  | -0.285024 | -0.872122 | -1.559047 |
| P  | 1.738083  | 0.261315  | -0.036604 |
| C  | 1.252965  | 1.988495  | -0.042457 |
| H  | 1.976716  | 2.800796  | -0.075462 |
| C  | 2.657726  | -0.016641 | 1.621582  |
| C  | 2.891261  | -0.018839 | -1.530796 |
| C  | 3.379065  | -1.359418 | 1.659363  |
| H  | 3.724764  | -1.557802 | 2.684676  |
| H  | 2.725055  | -2.189851 | 1.363524  |
| H  | 4.266491  | -1.372026 | 1.014141  |
| C  | 3.624686  | 1.116448  | 1.954697  |
| H  | 3.114329  | 2.086635  | 1.948783  |
| H  | 4.033809  | 0.958184  | 2.963545  |
| H  | 4.472619  | 1.169395  | 1.263580  |
| C  | 3.090612  | -1.512148 | -1.782111 |
| H  | 3.720357  | -1.645425 | -2.673768 |
| H  | 3.588184  | -2.022563 | -0.950200 |
| H  | 2.136151  | -2.018742 | -1.965324 |
| C  | 2.180031  | 0.591780  | -2.738907 |
| H  | 2.770591  | 0.385802  | -3.643205 |
| H  | 1.181097  | 0.160295  | -2.881839 |
| H  | 2.065584  | 1.676301  | -2.636044 |
| C  | 1.538805  | -0.013875 | 2.667977  |
| H  | 0.942722  | 0.906261  | 2.610225  |
| H  | 0.869305  | -0.878596 | 2.549891  |

|   |           |           |           |
|---|-----------|-----------|-----------|
| H | 1.974370  | -0.070664 | 3.676353  |
| C | 4.241850  | 0.668994  | -1.355075 |
| H | 4.848137  | 0.198649  | -0.571806 |
| H | 4.810001  | 0.597482  | -2.293982 |
| H | 4.132918  | 1.735365  | -1.118471 |
| N | -2.519622 | -0.931867 | -0.001243 |
| C | -3.186497 | 0.251235  | -0.012959 |
| C | -4.581548 | 0.275884  | -0.032816 |
| H | -5.104858 | 1.226816  | -0.043584 |
| C | -5.294169 | -0.911531 | -0.042781 |
| H | -6.380793 | -0.896335 | -0.059668 |
| C | -4.600466 | -2.117322 | -0.033633 |
| H | -5.116122 | -3.072590 | -0.043433 |
| C | -3.216800 | -2.077680 | -0.013186 |
| H | -2.624240 | -2.989403 | -0.008938 |
| C | 0.254523  | -2.508621 | 0.013795  |
| O | 0.663718  | -3.602822 | 0.019144  |

TS<sub>5-8</sub>

SCF done: -1251.326184

|    |           |           |           |
|----|-----------|-----------|-----------|
| C  | -0.084286 | 2.125740  | -0.659210 |
| C  | -0.578583 | 3.399869  | -1.120288 |
| C  | -1.905498 | 3.681972  | -1.128145 |
| C  | -2.816852 | 2.702040  | -0.670386 |
| C  | -2.320012 | 1.457616  | -0.337718 |
| N  | -1.006380 | 1.109220  | -0.387965 |
| H  | -2.266835 | 4.648660  | -1.471032 |
| H  | 0.155105  | 4.136182  | -1.439318 |
| H  | -3.884487 | 2.894514  | -0.648081 |
| Ru | -0.050436 | -0.867210 | 0.040862  |
| H  | -2.371356 | -1.218661 | -0.965295 |
| P  | 1.866659  | 0.384200  | 0.150204  |
| C  | 1.269240  | 1.942607  | -0.473680 |
| H  | 1.952836  | 2.754857  | -0.716094 |
| C  | -0.250047 | -1.708608 | -1.754627 |
| O  | 0.502783  | -1.923347 | -2.668792 |
| C  | 2.360787  | 0.666837  | 1.984193  |
| C  | 3.372979  | -0.112979 | -0.913460 |
| C  | 3.157632  | -0.503457 | 2.551270  |
| H  | 3.303882  | -0.351789 | 3.630909  |
| H  | 2.642111  | -1.462364 | 2.420642  |
| H  | 4.152974  | -0.588585 | 2.099001  |
| C  | 3.119410  | 1.977046  | 2.185492  |
| H  | 2.570015  | 2.823316  | 1.756055  |
| H  | 3.235221  | 2.162593  | 3.263450  |
| H  | 4.122211  | 1.958604  | 1.748623  |
| C  | 3.651742  | -1.607875 | -0.776491 |
| H  | 4.547689  | -1.856513 | -1.363155 |
| H  | 3.835591  | -1.921798 | 0.257602  |
| H  | 2.818487  | -2.195506 | -1.177840 |
| C  | 3.010349  | 0.184050  | -2.368580 |
| H  | 3.835841  | -0.164132 | -3.006144 |
| H  | 2.103566  | -0.347276 | -2.675759 |
| H  | 2.871341  | 1.255895  | -2.545728 |
| C  | 1.024193  | 0.775204  | 2.723693  |
| H  | 0.409180  | 1.589774  | 2.321218  |
| H  | 0.447368  | -0.160577 | 2.666992  |
| H  | 1.210050  | 0.986423  | 3.787043  |
| C  | 4.609713  | 0.700497  | -0.538786 |
| H  | 4.993431  | 0.455569  | 0.458404  |
| H  | 5.408430  | 0.475906  | -1.260013 |
| H  | 4.423081  | 1.781489  | -0.586703 |
| N  | -3.232440 | -0.811212 | -0.310408 |
| C  | -3.322388 | 0.466988  | 0.096419  |
| C  | -4.388699 | 0.819274  | 0.931221  |
| H  | -4.451550 | 1.838576  | 1.297719  |
| C  | -5.318866 | -0.134417 | 1.307512  |
| H  | -6.141663 | 0.142800  | 1.961560  |
| C  | -5.188762 | -1.451355 | 0.864658  |
| H  | -5.894661 | -2.223365 | 1.150988  |
| C  | -4.116084 | -1.752045 | 0.052908  |



|   |           |           |           |    |           |           |          |
|---|-----------|-----------|-----------|----|-----------|-----------|----------|
| H | -3.916640 | -2.746600 | -0.338521 | Ru | 0.532731  | -0.694086 | 0.481515 |
| C | 0.806772  | -2.389848 | 0.624637  | H  | 1.707320  | -0.379650 | 1.747159 |
| O | 1.338495  | -3.331583 | 1.061119  | P  | -1.609669 | 0.251710  | 0.161881 |
| O | -1.497921 | -2.003496 | -1.572774 | C  | -1.235051 | 2.005661  | 0.255502 |

**8**

SCF done: -1062.812093

|    |           |           |           |
|----|-----------|-----------|-----------|
| C  | -0.105372 | 2.421500  | -0.142048 |
| C  | 0.392673  | 3.754148  | 0.067904  |
| C  | 1.731157  | 3.977896  | 0.256286  |
| C  | 2.683826  | 2.924727  | 0.218127  |
| C  | 2.173830  | 1.693388  | -0.117948 |
| N  | 0.865732  | 1.468001  | -0.356127 |
| H  | 2.072638  | 4.992148  | 0.455871  |
| H  | -0.321001 | 4.570987  | 0.145788  |
| H  | 3.743557  | 3.091174  | 0.386391  |
| Ru | 0.655728  | -0.619284 | -0.203383 |
| H  | 3.936052  | 0.550218  | 1.476515  |
| P  | -1.634787 | 0.203092  | 0.004964  |
| C  | -1.415406 | 1.985832  | -0.097184 |
| H  | -2.234921 | 2.685659  | 0.051104  |
| C  | -2.680384 | -0.298328 | -1.519798 |
| C  | -2.565640 | -0.120643 | 1.649243  |
| C  | -3.177873 | -1.736674 | -1.429322 |
| H  | -3.582449 | -2.043751 | -2.404907 |
| H  | -2.371630 | -2.434415 | -1.167012 |
| H  | -3.985920 | -1.848939 | -0.696366 |
| C  | -3.851797 | 0.654833  | -1.742454 |
| H  | -3.510926 | 1.694458  | -1.813286 |
| H  | -4.348918 | 0.399524  | -2.689921 |
| H  | -4.606204 | 0.591724  | -0.951098 |
| C  | -2.674333 | -1.612255 | 1.952292  |
| H  | -3.124958 | -1.741613 | 2.947291  |
| H  | -3.308661 | -2.146129 | 1.237722  |
| H  | -1.694709 | -2.101577 | 1.968189  |
| C  | -1.694546 | 0.530563  | 2.725238  |
| H  | -2.124242 | 0.317537  | 3.714653  |
| H  | -0.670751 | 0.132925  | 2.702545  |
| H  | -1.636191 | 1.616787  | 2.597190  |
| C  | -1.720168 | -0.169295 | -2.704421 |
| H  | -1.299636 | 0.842746  | -2.766620 |
| H  | -0.887068 | -0.880681 | -2.619756 |
| H  | -2.263250 | -0.373790 | -3.638930 |
| C  | -3.952530 | 0.513940  | 1.671966  |
| H  | -4.658391 | -0.016526 | 1.022010  |
| H  | -4.356541 | 0.466196  | 2.694031  |
| H  | -3.930499 | 1.570360  | 1.376210  |
| N  | 3.735456  | -0.063002 | 0.696399  |
| C  | 2.792833  | 0.363940  | -0.205132 |
| C  | 2.439669  | -0.469152 | -1.314555 |
| H  | 2.152531  | -0.045483 | -2.275230 |
| C  | 2.565197  | -1.854328 | -1.073830 |
| H  | 2.253807  | -2.557962 | -1.839993 |
| C  | 3.451929  | -2.297836 | -0.030495 |
| H  | 3.663750  | -3.354976 | 0.089787  |
| C  | 4.048569  | -1.397701 | 0.792269  |
| H  | 4.752511  | -1.669138 | 1.570680  |
| C  | 0.414701  | -2.346234 | 0.494306  |
| O  | 0.333184  | -3.381284 | 1.027122  |

**TS<sub>8</sub>-7**

SCF done: -1062.796433

|   |           |          |          |
|---|-----------|----------|----------|
| C | 0.097221  | 2.371507 | 0.272802 |
| C | 0.578185  | 3.724721 | 0.189625 |
| C | 1.914635  | 3.999881 | 0.109847 |
| C | 2.873358  | 2.957798 | 0.107251 |
| C | 2.375998  | 1.680598 | 0.230519 |
| N | 1.060464  | 1.379821 | 0.357184 |
| H | 2.245877  | 5.034156 | 0.040019 |
| H | -0.155563 | 4.527183 | 0.169488 |
| H | 3.940042  | 3.145244 | 0.034264 |

|   |           |           |           |
|---|-----------|-----------|-----------|
| H | 0.532731  | -0.694086 | 0.481515  |
| H | 1.707320  | -0.379650 | 1.747159  |
| P | -1.609669 | 0.251710  | 0.161881  |
| C | -1.235051 | 2.005661  | 0.255502  |
| H | -2.003768 | 2.769206  | 0.154063  |
| C | -2.318963 | -0.092611 | -1.586960 |
| C | -2.924796 | -0.065001 | 1.516340  |
| C | -2.392937 | -1.595218 | -1.851594 |
| H | -2.754560 | -1.764603 | -2.876795 |
| H | -1.405061 | -2.061726 | -1.756398 |
| H | -3.075886 | -2.114873 | -1.171738 |
| C | -3.682633 | 0.552388  | -1.813936 |
| H | -3.675995 | 1.622188  | -1.567776 |
| H | -3.955083 | 0.461744  | -2.875848 |
| H | -4.477887 | 0.066483  | -1.235216 |
| C | -3.612972 | -1.416685 | 1.352081  |
| H | -4.231294 | -1.613823 | 2.240181  |
| H | -4.282447 | -1.439446 | 0.483407  |
| H | -2.895580 | -2.241695 | 1.262257  |
| C | -2.148980 | -0.052334 | 2.835072  |
| H | -2.857148 | -0.112422 | 3.674587  |
| H | -1.458023 | -0.901123 | 2.905289  |
| C | -1.566799 | 0.872099  | 2.943053  |
| H | -1.309844 | 0.520011  | -2.558407 |
| H | -1.261413 | 1.610109  | -2.459384 |
| H | -0.301551 | 0.117985  | -2.387629 |
| H | -1.606395 | 0.275411  | -3.588743 |
| C | -3.967333 | 1.050890  | 1.563846  |
| H | -4.566282 | 1.113754  | 0.649339  |
| H | -4.659525 | 0.858966  | 2.396644  |
| H | -3.499534 | 2.026365  | 1.738909  |
| N | 2.641556  | -0.580993 | 0.957055  |
| C | 3.147346  | 0.443019  | 0.130017  |
| C | 4.056646  | 0.119952  | -0.840870 |
| H | 4.429810  | 0.921363  | -1.473351 |
| C | 4.371173  | -1.225693 | -1.107369 |
| H | 5.076745  | -1.473357 | -1.894450 |
| C | 3.703422  | -2.225214 | -0.424526 |
| C | 3.862545  | -3.273243 | -0.657373 |
| C | 2.839668  | -1.905456 | 0.624174  |
| H | 2.493043  | -2.633046 | 1.348543  |
| C | -0.149313 | -2.381549 | 0.820388  |
| O | -0.597319 | -3.425077 | 1.109838  |

**9**

SCF done: -1364.654956

|    |           |           |           |
|----|-----------|-----------|-----------|
| C  | 0.045720  | 2.346954  | -0.303051 |
| C  | -0.441675 | 3.689196  | -0.482987 |
| C  | -1.776898 | 3.959218  | -0.456230 |
| C  | -2.724713 | 2.923814  | -0.264977 |
| C  | -2.246825 | 1.640849  | -0.128996 |
| N  | -0.916489 | 1.358338  | -0.173692 |
| H  | -2.123572 | 4.982694  | -0.580606 |
| H  | 0.287430  | 4.483480  | -0.622540 |
| H  | -3.785692 | 3.144850  | -0.229251 |
| Ru | -0.318675 | -0.613816 | 0.306676  |
| H  | -1.022837 | 0.572347  | -2.120112 |
| P  | 1.882563  | 0.309975  | -0.030037 |
| C  | 1.388295  | 2.019988  | -0.261330 |
| H  | 2.129473  | 2.797958  | -0.437265 |
| C  | -0.597931 | -1.225194 | -1.702433 |
| O  | -0.532577 | -2.368989 | -2.091228 |
| C  | 3.095185  | 0.300991  | 1.475198  |
| C  | 2.869591  | -0.248785 | -1.599980 |
| C  | 3.828012  | -1.032997 | 1.587866  |
| H  | 4.408881  | -1.046458 | 2.521211  |
| H  | 3.127891  | -1.877576 | 1.625874  |
| H  | 4.529804  | -1.210028 | 0.767487  |
| C  | 4.080943  | 1.469280  | 1.396785  |
| H  | 3.549472  | 2.428194  | 1.391913  |
| H  | 4.719881  | 1.450482  | 2.290940  |

|   |           |           |           |   |           |           |           |
|---|-----------|-----------|-----------|---|-----------|-----------|-----------|
| H | 4.739972  | 1.436603  | 0.528311  | H | 1.843254  | 0.135235  | 3.038706  |
| C | 2.897408  | -1.776096 | -1.678498 | H | 3.249004  | 1.152274  | 3.377317  |
| H | 3.469405  | -2.073375 | -2.569429 | C | 4.241890  | -0.177938 | -1.789244 |
| H | 3.386177  | -2.237136 | -0.812306 | H | 4.920501  | -0.528256 | -1.005352 |
| H | 1.892768  | -2.201672 | -1.780413 | H | 4.594147  | -0.616228 | -2.734234 |
| C | 2.151406  | 0.307580  | -2.829521 | H | 4.342069  | 0.910727  | -1.885710 |
| H | 2.688876  | -0.033056 | -3.725568 | N | -2.461492 | -0.564571 | 0.280310  |
| H | 1.120855  | -0.037542 | -2.925126 | C | -3.043087 | 0.587249  | -0.160070 |
| H | 2.147221  | 1.403554  | -2.832619 | C | -4.429130 | 0.684379  | -0.305108 |
| C | 2.288679  | 0.502235  | 2.754791  | H | -4.859766 | 1.599700  | -0.701652 |
| H | 1.625345  | 1.373827  | 2.690606  | C | -5.231438 | -0.391685 | 0.028716  |
| H | 1.698304  | -0.383641 | 3.008197  | H | -6.310288 | -0.328822 | -0.083519 |
| H | 2.985080  | 0.675302  | 3.587169  | C | -4.629043 | -1.561683 | 0.489743  |
| C | 4.296792  | 0.298608  | -1.652447 | H | -5.215420 | -2.437786 | 0.748549  |
| H | 4.958439  | -0.113215 | -0.883558 | C | -3.251181 | -1.608063 | 0.590645  |
| H | 4.730200  | 0.023124  | -2.624313 | H | -2.733372 | -2.509421 | 0.908643  |
| H | 4.319711  | 1.394083  | -1.590521 | C | 0.167738  | -2.214522 | 0.972807  |
| N | -2.494484 | -0.728245 | 0.220143  | O | 0.483893  | -3.292699 | 1.281331  |
| C | -3.116530 | 0.459996  | 0.027560  | O | -1.225032 | -0.837182 | -2.481905 |
| C | -4.508607 | 0.516583  | -0.046669 | C | -0.501542 | 0.340188  | 2.298728  |
| H | -5.002662 | 1.469828  | -0.205692 | O | -0.738734 | 0.373720  | 3.434479  |
| C | -5.250983 | -0.647515 | 0.061883  |   |           |           |           |
| H | -6.335417 | -0.608854 | 0.002632  |   |           |           |           |
| C | -4.594050 | -1.861858 | 0.229391  |   |           |           |           |
| H | -5.135858 | -2.799607 | 0.298220  |   |           |           |           |
| C | -3.211201 | -1.855304 | 0.299588  |   |           |           |           |
| H | -2.641161 | -2.774448 | 0.412042  |   |           |           |           |
| C | 0.266028  | -2.381095 | 0.648277  |   |           |           |           |
| O | 0.635084  | -3.458285 | 0.842073  |   |           |           |           |
| O | -1.098818 | -0.287645 | -2.562530 |   |           |           |           |
| C | -0.567342 | -0.132006 | 2.225313  |   |           |           |           |
| O | -0.983157 | 0.122577  | 3.267834  |   |           |           |           |

**TS<sub>9-11</sub>**

SCF done: -1364.605061

|    |           |           |           |
|----|-----------|-----------|-----------|
| C  | 0.241118  | 2.320871  | -0.729031 |
| C  | -0.194765 | 3.678161  | -0.922485 |
| C  | -1.501650 | 4.010049  | -0.772351 |
| C  | -2.490308 | 3.020488  | -0.452115 |
| C  | -2.152812 | 1.707716  | -0.452934 |
| N  | -0.804934 | 1.331532  | -0.700664 |
| H  | -1.809527 | 5.049057  | -0.856006 |
| H  | 0.562211  | 4.435669  | -1.110047 |
| H  | -3.498239 | 3.325887  | -0.187371 |
| Ru | -0.307761 | -0.484223 | 0.506883  |
| H  | -0.778808 | 0.724497  | -1.538827 |
| P  | 1.912146  | 0.193696  | -0.044390 |
| C  | 1.524618  | 1.912900  | -0.568500 |
| H  | 2.318397  | 2.637989  | -0.751161 |
| C  | -1.037257 | -1.775815 | -1.743767 |
| O  | -1.098093 | -2.946806 | -1.548176 |
| C  | 3.216209  | 0.419099  | 1.361202  |
| C  | 2.793497  | -0.605606 | -1.573168 |
| C  | 3.840784  | -0.941534 | 1.670099  |
| H  | 4.452121  | -0.856897 | 2.579603  |
| H  | 3.072863  | -1.703569 | 1.859928  |
| H  | 4.495913  | -1.304155 | 0.870447  |
| C  | 4.294608  | 1.454935  | 1.037536  |
| H  | 3.863755  | 2.455512  | 0.910787  |
| H  | 4.984299  | 1.512047  | 1.891513  |
| H  | 4.894640  | 1.220525  | 0.156266  |
| C  | 2.714163  | -2.125200 | -1.434581 |
| H  | 3.165181  | -2.590614 | -2.322445 |
| H  | 3.252288  | -2.499776 | -0.556193 |
| H  | 1.676790  | -2.471773 | -1.365977 |
| C  | 2.011386  | -0.179369 | -2.815097 |
| H  | 2.423993  | -0.706259 | -3.686896 |
| H  | 0.949933  | -0.433290 | -2.756551 |
| H  | 2.100286  | 0.897429  | -3.004187 |
| C  | 2.495599  | 0.903813  | 2.616533  |
| H  | 1.896956  | 1.803887  | 2.430550  |

**11**

SCF done: -1176.109274

|    |           |           |           |
|----|-----------|-----------|-----------|
| C  | 0.021992  | 2.362542  | -0.144313 |
| C  | -0.469166 | 3.694737  | 0.016083  |
| C  | -1.808490 | 3.942352  | 0.135505  |
| C  | -2.766382 | 2.894187  | 0.089369  |
| C  | -2.343491 | 1.620769  | -0.179808 |
| N  | -0.980769 | 1.382544  | -0.367516 |
| H  | -2.151158 | 4.959959  | 0.305765  |
| H  | 0.259192  | 4.496669  | 0.107149  |
| H  | -3.811156 | 3.094012  | 0.305348  |
| Ru | -0.377327 | -0.759431 | 0.153660  |
| H  | -0.782529 | 0.803236  | -1.218325 |
| P  | 1.793245  | 0.185859  | -0.083635 |
| C  | 1.327100  | 1.952285  | -0.103171 |
| H  | 2.097418  | 2.722775  | -0.088621 |
| C  | 3.130179  | 0.076054  | 1.297172  |
| C  | 2.638954  | -0.109548 | -1.804147 |
| C  | 3.919268  | -1.223111 | 1.152015  |
| H  | 4.503706  | -1.392616 | 2.067396  |
| H  | 3.254886  | -2.088170 | 1.019155  |
| H  | 4.627556  | -1.194198 | 0.316160  |
| C  | 4.076169  | 1.277493  | 1.306693  |
| H  | 3.543191  | 2.202574  | 1.554873  |
| H  | 4.832642  | 1.120324  | 2.088934  |
| H  | 4.609206  | 1.428168  | 0.364452  |
| C  | 2.941598  | -1.587432 | -2.040490 |
| H  | 3.254973  | -1.723102 | -3.085732 |
| H  | 3.751795  | -1.964059 | -1.409351 |
| C  | 2.061720  | -2.219216 | -1.878840 |
| C  | 1.614033  | 0.335134  | -2.848502 |
| H  | 2.035469  | 0.182515  | -3.852138 |
| H  | 0.691270  | -0.256942 | -2.779889 |
| H  | 1.361561  | 1.398547  | -2.746254 |
| C  | 2.407152  | 0.049660  | 2.640678  |
| H  | 1.693003  | 0.875936  | 2.743767  |
| H  | 1.870673  | -0.890664 | 2.794468  |
| H  | 3.152917  | 0.144450  | 3.442867  |
| C  | 3.908072  | 0.715406  | -1.997676 |
| H  | 4.734327  | 0.365024  | -1.368655 |
| H  | 4.240340  | 0.625002  | -3.042256 |
| H  | 3.743815  | 1.782913  | -1.801200 |
| N  | -2.515078 | -0.780583 | -0.168802 |
| C  | -3.162111 | 0.421437  | -0.249802 |
| C  | -4.554157 | 0.482072  | -0.397453 |
| H  | -5.032009 | 1.452423  | -0.501524 |
| C  | -5.297240 | -0.679272 | -0.427992 |
| H  | -6.377255 | -0.640160 | -0.539982 |
| C  | -4.630836 | -1.904074 | -0.329851 |

|   |           |           |           |    |           |           |           |
|---|-----------|-----------|-----------|----|-----------|-----------|-----------|
| H | -5.169121 | -2.846479 | -0.356608 | C  | -2.265384 | 1.580333  | -0.397197 |
| C | -3.256950 | -1.907123 | -0.212387 | N  | -0.960956 | 1.193543  | -0.443449 |
| H | -2.698233 | -2.837264 | -0.150214 | H  | -2.084824 | 4.821582  | -1.364358 |
| C | 0.040702  | -2.490677 | -0.411459 | H  | 0.317999  | 4.227562  | -1.299175 |
| O | 0.244829  | -3.624703 | -0.616970 | H  | -3.775314 | 3.078078  | -0.664020 |
| C | -0.523608 | -0.790026 | 2.079666  | Ru | -0.086163 | -0.851017 | -0.026540 |
| O | -0.669866 | -1.123483 | 3.183991  | H  | -2.386824 | -1.031427 | -1.187696 |

**TS<sub>11-1</sub>**

SCF done: -1176.108942

|    |           |           |           |
|----|-----------|-----------|-----------|
| C  | -0.015285 | 2.370449  | 0.013942  |
| C  | -0.511364 | 3.701232  | 0.127234  |
| C  | -1.856296 | 3.962451  | 0.157205  |
| C  | -2.800705 | 2.918555  | 0.078205  |
| C  | -2.344389 | 1.623292  | -0.035030 |
| N  | -0.989171 | 1.359095  | -0.099585 |
| H  | -2.203205 | 4.988606  | 0.251093  |
| H  | 0.215943  | 4.504579  | 0.214613  |
| H  | -3.863501 | 3.130861  | 0.127152  |
| Ru | -0.371913 | -0.713748 | 0.039999  |
| H  | -0.701236 | 0.658302  | -1.075590 |
| P  | 1.790275  | 0.265208  | -0.063419 |
| C  | 1.311426  | 2.001302  | -0.036581 |
| H  | 2.066105  | 2.786545  | -0.054240 |
| C  | 2.934845  | -0.015310 | 1.460423  |
| C  | 2.812585  | 0.038461  | -1.682790 |
| C  | 3.102131  | -1.511637 | 1.722999  |
| H  | 3.722785  | -1.653142 | 2.619400  |
| H  | 2.141898  | -2.005409 | 1.906215  |
| H  | 3.596360  | -2.032696 | 0.895847  |
| C  | 4.308579  | 0.636338  | 1.309672  |
| H  | 4.235522  | 1.702840  | 1.060916  |
| H  | 4.840448  | 0.562314  | 2.269302  |
| H  | 4.934620  | 0.142786  | 0.558070  |
| C  | 3.574715  | -1.283418 | -1.691735 |
| H  | 4.016396  | -1.438176 | -2.686636 |
| H  | 4.397309  | -1.298028 | -0.967977 |
| H  | 2.919355  | -2.140265 | -1.490145 |
| C  | 1.807766  | 0.033046  | -2.835873 |
| H  | 2.360488  | -0.013548 | -3.785386 |
| H  | 1.127324  | -0.823301 | -2.792830 |
| H  | 1.198870  | 0.946300  | -2.843516 |
| C  | 2.246237  | 0.637238  | 2.659420  |
| H  | 2.192689  | 1.725904  | 2.547135  |
| H  | 1.227489  | 0.268035  | 2.814731  |
| H  | 2.824629  | 0.409446  | 3.565984  |
| C  | 3.766332  | 1.208256  | -1.925760 |
| H  | 4.565219  | 1.281974  | -1.184006 |
| H  | 4.243224  | 1.077424  | -2.907598 |
| H  | 3.225578  | 2.161749  | -1.949604 |
| N  | -2.526492 | -0.763661 | -0.193070 |
| C  | -3.174917 | 0.433143  | -0.134788 |
| C  | -4.574453 | 0.487801  | -0.199793 |
| H  | -5.072497 | 1.452060  | -0.163213 |
| C  | -5.306848 | -0.675093 | -0.308952 |
| H  | -6.391795 | -0.637671 | -0.356735 |
| C  | -4.631544 | -1.896975 | -0.362751 |
| H  | -5.164435 | -2.838294 | -0.453872 |
| C  | -3.254095 | -1.891855 | -0.303949 |
| H  | -2.682635 | -2.815691 | -0.345708 |
| C  | 0.137194  | -2.306369 | -0.822387 |
| O  | 0.444303  | -3.302232 | -1.341933 |
| C  | -0.360855 | -1.379827 | 1.878133  |
| O  | -0.372222 | -1.934036 | 2.896074  |

**TS<sub>9-10</sub>**

SCF done: -1364.607793

|   |           |          |           |
|---|-----------|----------|-----------|
| C | -0.003690 | 2.189456 | -0.633536 |
| C | -0.447091 | 3.499850 | -1.040284 |
| C | -1.763561 | 3.826751 | -1.065230 |
| C | -2.713379 | 2.855323 | -0.677886 |

**10**

SCF done: -1176.118934

|    |           |           |           |
|----|-----------|-----------|-----------|
| C  | 0.049555  | 2.217895  | 0.389784  |
| C  | -0.409029 | 3.561191  | 0.653655  |
| C  | -1.731596 | 3.871504  | 0.675895  |
| C  | -2.681543 | 2.859520  | 0.406157  |
| C  | -2.213345 | 1.573816  | 0.212589  |
| N  | -0.909740 | 1.210001  | 0.291814  |
| H  | -2.057742 | 4.892403  | 0.860467  |
| H  | 0.346910  | 4.325909  | 0.817563  |
| H  | -3.730812 | 3.101379  | 0.275852  |
| Ru | -0.134736 | -0.894284 | 0.469702  |
| H  | -1.675386 | -0.614693 | -0.987758 |
| P  | 1.929201  | 0.290254  | -0.135408 |
| C  | 1.395167  | 1.961261  | 0.237690  |
| H  | 2.087351  | 2.800566  | 0.287346  |
| C  | 3.364618  | -0.039138 | 1.083079  |

|                          |           |           |           |                          |           |           |           |
|--------------------------|-----------|-----------|-----------|--------------------------|-----------|-----------|-----------|
| C                        | 2.524244  | 0.272246  | -1.957324 | H                        | -1.485688 | 1.109865  | 3.766556  |
| C                        | 4.096285  | -1.337107 | 0.751116  | H                        | -0.267009 | 0.650655  | 2.557317  |
| H                        | 4.761540  | -1.598629 | 1.586707  | H                        | -1.190387 | 2.151867  | 2.352476  |
| H                        | 3.406392  | -2.177704 | 0.603722  | C                        | -2.708450 | -0.573041 | -2.385726 |
| H                        | 4.725724  | -1.243321 | -0.142187 | H                        | -2.074508 | 0.225737  | -2.788911 |
| C                        | 4.359832  | 1.116571  | 1.149885  | H                        | -2.128508 | -1.501956 | -2.360681 |
| H                        | 3.875067  | 2.047126  | 1.466659  | H                        | -3.546814 | -0.722498 | -3.080916 |
| H                        | 5.134067  | 0.881188  | 1.894972  | C                        | -3.663664 | 1.081831  | 2.141309  |
| H                        | 4.866990  | 1.299224  | 0.196899  | H                        | -4.521491 | 0.532742  | 1.736997  |
| C                        | 2.769133  | -1.164936 | -2.412266 | H                        | -3.847041 | 1.219169  | 3.217254  |
| H                        | 2.984822  | -1.174722 | -3.490961 | H                        | -3.637135 | 2.079974  | 1.685140  |
| H                        | 3.619640  | -1.631504 | -1.904200 | N                        | 2.437233  | -0.804216 | 0.470887  |
| H                        | 1.888017  | -1.795345 | -2.238926 | C                        | 3.131416  | 0.375196  | 0.199651  |
| C                        | 1.346641  | 0.836641  | -2.754410 | C                        | 4.525811  | 0.380066  | 0.251147  |
| H                        | 1.583368  | 0.802032  | -3.827767 | H                        | 5.042331  | 1.308799  | 0.026265  |
| H                        | 0.434458  | 0.246634  | -2.588728 | C                        | 5.239823  | -0.764629 | 0.536141  |
| H                        | 1.131966  | 1.875642  | -2.478427 | H                        | 6.324587  | -0.750376 | 0.562920  |
| C                        | 2.696948  | -0.181923 | 2.452865  | C                        | 4.527548  | -1.952437 | 0.784078  |
| H                        | 2.113672  | 0.711514  | 2.708557  | H                        | 5.043458  | -2.884671 | 0.994266  |
| H                        | 2.021358  | -1.045854 | 2.483778  | C                        | 3.164089  | -1.947368 | 0.755708  |
| H                        | 3.472086  | -0.318176 | 3.221428  | H                        | 2.562763  | -2.829155 | 0.957209  |
| C                        | 3.755382  | 1.131024  | -2.220469 | C                        | -0.289368 | -2.508040 | 0.083493  |
| H                        | 4.664542  | 0.696843  | -1.787905 | O                        | -0.696599 | -3.574579 | 0.297242  |
| H                        | 3.921721  | 1.212591  | -3.305134 | C                        | 0.423658  | -1.008127 | -2.121874 |
| H                        | 3.635427  | 2.149433  | -1.827983 | O                        | 0.507961  | -1.176862 | -3.262463 |
| N                        | -2.731107 | -0.442002 | -1.014902 |                          |           |           |           |
| C                        | -3.186420 | 0.577571  | -0.247233 |                          |           |           |           |
| C                        | -4.555317 | 0.610670  | 0.032833  |                          |           |           |           |
| H                        | -4.939530 | 1.390170  | 0.682183  |                          |           |           |           |
| C                        | -5.392904 | -0.366750 | -0.471144 |                          |           |           |           |
| H                        | -6.452876 | -0.343567 | -0.233601 |                          |           |           |           |
| C                        | -4.873673 | -1.402255 | -1.258892 |                          |           |           |           |
| H                        | -5.506761 | -2.188807 | -1.654396 |                          |           |           |           |
| C                        | -3.521241 | -1.419804 | -1.495323 |                          |           |           |           |
| H                        | -3.012816 | -2.205341 | -2.047102 |                          |           |           |           |
| C                        | 0.609995  | -2.577147 | 0.285387  |                          |           |           |           |
| O                        | 1.089467  | -3.623852 | 0.091742  |                          |           |           |           |
| C                        | -1.621215 | -1.621800 | 1.375776  |                          |           |           |           |
| O                        | -2.528463 | -2.044973 | 1.972866  |                          |           |           |           |
| <b>TS<sub>10-1</sub></b> |           |           |           | <b>TS<sub>1-12</sub></b> |           |           |           |
| SCF done: -1176.097918   |           |           |           | SCF done: -1176.102677   |           |           |           |
| C                        | 0.040850  | 2.258074  | -0.392542 | C                        | -0.028414 | 2.153422  | -0.806187 |
| C                        | 0.542170  | 3.587199  | -0.526770 | C                        | -0.422854 | 3.466711  | -1.111642 |
| C                        | 1.886663  | 3.848626  | -0.439578 | C                        | -1.752325 | 3.831319  | -1.003509 |
| C                        | 2.805262  | 2.817493  | -0.203881 | C                        | -2.713225 | 2.873954  | -0.655727 |
| C                        | 2.305015  | 1.523018  | -0.106092 | C                        | -2.287134 | 1.592266  | -0.348043 |
| N                        | 0.980247  | 1.248588  | -0.236959 | N                        | -0.967190 | 1.276027  | -0.328007 |
| H                        | 2.242016  | 4.873120  | -0.530236 | H                        | -2.058718 | 4.847740  | -1.237611 |
| H                        | -0.174163 | 4.391442  | -0.674788 | H                        | 0.323885  | 4.178515  | -1.455661 |
| H                        | 3.862354  | 3.024455  | -0.077567 | H                        | -3.771440 | 3.117417  | -0.680993 |
| Ru                       | 0.358294  | -0.763658 | -0.217657 | Ru                       | -0.367827 | -0.656025 | 0.161075  |
| H                        | 1.543962  | -0.655513 | 1.244561  | H                        | 0.547480  | 0.212797  | -1.493978 |
| P                        | -1.777180 | 0.287313  | 0.095721  | P                        | 1.811742  | 0.212758  | -0.013748 |
| C                        | -1.311673 | 1.939826  | -0.388046 | C                        | 1.244518  | 1.573502  | -1.083022 |
| H                        | -2.040087 | 2.747939  | -0.426730 | H                        | 1.981397  | 2.217707  | -1.573868 |
| C                        | -3.263788 | -0.213092 | -1.010087 | C                        | 0.134208  | -2.450988 | -0.122040 |
| C                        | -2.344197 | 0.340758  | 1.946970  | O                        | 0.412995  | -3.569224 | -0.289752 |
| C                        | -4.002774 | -1.424492 | -0.450423 | C                        | 2.620087  | 0.918487  | 1.592622  |
| H                        | -4.746311 | -1.763385 | -1.186158 | C                        | 3.134675  | -0.674630 | -1.087997 |
| H                        | -3.325415 | -2.266866 | -0.259827 | C                        | 2.826564  | -0.174173 | 2.639983  |
| H                        | -4.543813 | -1.196643 | 0.474981  | H                        | 3.167101  | 0.289811  | 3.577131  |
| C                        | -4.229293 | 0.959323  | -1.191644 | H                        | 1.900828  | -0.715196 | 2.862017  |
| H                        | -3.734427 | 1.806547  | -1.679425 | H                        | 3.585653  | -0.905378 | 2.344992  |
| H                        | -5.055720 | 0.639352  | -1.842473 | C                        | 3.932763  | 1.655036  | 1.342650  |
| H                        | -4.668745 | 1.309185  | -0.252897 | H                        | 3.838265  | 2.400114  | 0.541874  |
| C                        | -2.429302 | -1.063703 | 2.539899  | H                        | 4.218909  | 2.193586  | 2.258000  |
| H                        | -2.683860 | -0.991902 | 3.607569  | H                        | 4.759716  | 0.978433  | 1.099086  |
| H                        | -3.190599 | -1.690056 | 2.063282  | C                        | 3.867899  | -1.697254 | -0.219881 |
| H                        | -1.467234 | -1.585769 | 2.464339  | H                        | 4.503687  | -2.322920 | -0.861466 |
| C                        | -1.255149 | 1.111881  | 2.691682  | H                        | 4.520949  | -1.224356 | 0.522116  |
|                          |           |           |           | H                        | 3.170867  | -2.363971 | 0.304092  |
|                          |           |           |           | C                        | 2.476166  | -1.416085 | -2.252416 |
|                          |           |           |           | H                        | 3.277065  | -1.842387 | -2.874100 |
|                          |           |           |           | H                        | 1.837067  | -2.239488 | -1.924918 |
|                          |           |           |           | H                        | 1.880614  | -0.749253 | -2.884457 |
|                          |           |           |           | C                        | 1.610945  | 1.936019  | 2.130275  |
|                          |           |           |           | H                        | 1.495658  | 2.788824  | 1.451029  |
|                          |           |           |           | H                        | 0.621340  | 1.495354  | 2.294971  |
|                          |           |           |           | H                        | 1.970965  | 2.317396  | 3.096009  |
|                          |           |           |           | C                        | 4.136356  | 0.310585  | -1.694960 |
|                          |           |           |           | H                        | 4.659201  | 0.918791  | -0.953756 |
|                          |           |           |           | H                        | 4.897608  | -0.261122 | -2.244106 |
|                          |           |           |           | H                        | 3.656170  | 0.980856  | -2.417107 |
|                          |           |           |           | N                        | -2.526982 | -0.764419 | -0.136092 |

|   |           |           |           |
|---|-----------|-----------|-----------|
| C | -3.161011 | 0.441793  | -0.162051 |
| C | -4.553244 | 0.522638  | -0.060830 |
| H | -5.032333 | 1.498021  | -0.054891 |
| C | -5.304417 | -0.632698 | 0.032430  |
| H | -6.387320 | -0.579865 | 0.105885  |
| C | -4.648221 | -1.865892 | 0.029465  |
| H | -5.196590 | -2.800953 | 0.089583  |
| C | -3.269863 | -1.881699 | -0.045476 |
| H | -2.713611 | -2.816214 | -0.032542 |
| C | -0.582482 | -0.835469 | 2.080606  |
| O | -0.614269 | -0.985148 | 3.229882  |

**TS<sub>1-12</sub>**

SCF done: -1252.505914

|    |           |           |           |
|----|-----------|-----------|-----------|
| C  | 0.033953  | 2.178755  | -0.630330 |
| C  | -0.358076 | 3.524098  | -0.799551 |
| C  | -1.685876 | 3.880161  | -0.668884 |
| C  | -2.653178 | 2.908218  | -0.402636 |
| C  | -2.228071 | 1.599936  | -0.208613 |
| N  | -0.915497 | 1.271167  | -0.250895 |
| H  | -1.984981 | 4.917214  | -0.803100 |
| H  | 0.396235  | 4.263328  | -1.057989 |
| H  | -3.706241 | 3.169312  | -0.369393 |
| Ru | -0.383351 | -0.754045 | 0.121575  |
| H  | -0.169201 | -0.494145 | -1.814060 |
| P  | 1.814025  | 0.154539  | -0.046975 |
| C  | 1.329068  | 1.661316  | -0.976190 |
| H  | 2.099543  | 2.415207  | -1.161181 |
| C  | 0.042028  | -2.510698 | -0.342579 |
| O  | 0.277777  | -3.614335 | -0.641448 |
| C  | 2.555306  | 0.779569  | 1.637809  |
| C  | 3.230440  | -0.653499 | -1.072225 |
| C  | 2.730882  | -0.366783 | 2.633635  |
| H  | 3.029950  | 0.050030  | 3.606336  |
| H  | 1.802469  | -0.924339 | 2.788454  |
| H  | 3.505513  | -1.077745 | 2.333795  |
| C  | 3.880301  | 1.521629  | 1.479454  |
| H  | 3.814069  | 2.334860  | 0.745669  |
| H  | 4.146971  | 1.977465  | 2.444410  |
| H  | 4.708887  | 0.861981  | 1.199033  |
| C  | 3.993788  | -1.645005 | -0.195183 |
| H  | 4.695288  | -2.210383 | -0.824224 |
| H  | 4.582515  | -1.156978 | 0.588978  |
| H  | 3.317085  | -2.371633 | 0.274761  |
| C  | 2.645096  | -1.440259 | -2.245905 |
| H  | 3.479408  | -1.906817 | -2.789582 |
| H  | 1.975896  | -2.240667 | -1.918689 |
| H  | 2.101317  | -0.810002 | -2.954050 |
| C  | 1.541867  | 1.769663  | 2.215337  |
| H  | 1.473248  | 2.681571  | 1.610870  |
| H  | 0.539366  | 1.335117  | 2.301490  |
| H  | 1.868996  | 2.060660  | 3.223380  |
| C  | 4.182076  | 0.390971  | -1.654215 |
| H  | 4.690189  | 0.991902  | -0.895826 |
| H  | 4.957458  | -0.126410 | -2.237238 |
| H  | 3.658399  | 1.067320  | -2.339663 |
| N  | -2.533731 | -0.769067 | -0.049762 |
| C  | -3.127087 | 0.456208  | -0.034839 |
| C  | -4.511807 | 0.577753  | 0.103565  |
| H  | -4.963808 | 1.564863  | 0.138745  |
| C  | -5.298284 | -0.555809 | 0.204277  |
| H  | -6.376013 | -0.468829 | 0.312219  |
| C  | -4.683142 | -1.806161 | 0.164008  |
| H  | -5.257548 | -2.724938 | 0.231485  |
| C  | -3.307592 | -1.864084 | 0.043423  |
| H  | -2.779219 | -2.814177 | 0.023437  |
| C  | -0.564570 | -1.043670 | 2.086177  |
| O  | -0.735843 | -1.525192 | 3.127149  |
| O  | 0.107987  | 0.188525  | -2.827826 |
| H  | -0.715771 | 0.645779  | -3.049646 |
| H  | 0.733341  | 0.910060  | -2.217991 |

**12**

SCF done: -1176.170369

|    |           |           |           |
|----|-----------|-----------|-----------|
| C  | -0.032068 | 2.310492  | -0.435107 |
| C  | -0.415863 | 3.631139  | -0.401926 |
| C  | -1.780096 | 3.956101  | -0.277926 |
| C  | -2.704184 | 2.938556  | -0.233466 |
| C  | -2.274930 | 1.601688  | -0.266198 |
| N  | -0.938022 | 1.297077  | -0.312649 |
| H  | -2.096911 | 4.994610  | -0.242371 |
| H  | 0.336198  | 4.410176  | -0.504140 |
| H  | -3.764822 | 3.163564  | -0.160905 |
| Ru | -0.425593 | -0.701796 | 0.069964  |
| P  | 1.774943  | 0.150528  | -0.134736 |
| C  | -0.047091 | -2.445234 | -0.545578 |
| O  | 0.164157  | -3.545089 | -0.875714 |
| C  | 2.771065  | 0.457647  | 1.481787  |
| C  | 2.944726  | -0.477973 | -1.527670 |
| C  | 2.954389  | -0.865419 | 2.225858  |
| H  | 3.447651  | -0.669933 | 3.188404  |
| H  | 1.999438  | -1.355679 | 2.438289  |
| H  | 3.582674  | -1.570751 | 1.671411  |
| C  | 4.136805  | 1.105900  | 1.270297  |
| H  | 4.086441  | 2.018278  | 0.662562  |
| H  | 4.546089  | 1.391432  | 2.249898  |
| H  | 4.859392  | 0.421406  | 0.812040  |
| C  | 3.650631  | -1.749578 | -1.058777 |
| H  | 4.156597  | -2.217549 | -1.914685 |
| H  | 4.415175  | -1.545290 | -0.300559 |
| H  | 2.945918  | -2.486398 | -0.652854 |
| C  | 2.064706  | -0.831038 | -2.729233 |
| H  | 2.714898  | -1.143132 | -3.559058 |
| H  | 1.376444  | -1.650793 | -2.505359 |
| H  | 1.462351  | 0.016244  | -3.080689 |
| C  | 1.921198  | 1.398414  | 2.340109  |
| H  | 1.841332  | 2.402973  | 1.905781  |
| H  | 0.908484  | 1.011794  | 2.497991  |
| H  | 2.396363  | 1.503899  | 3.325166  |
| C  | 3.981141  | 0.549041  | -1.986884 |
| H  | 4.690568  | 0.827657  | -1.204551 |
| H  | 4.561639  | 0.111970  | -2.811656 |
| H  | 3.522157  | 1.466042  | -2.375714 |
| N  | -2.511280 | -0.761128 | -0.183196 |
| C  | -3.143564 | 0.457911  | -0.227662 |
| C  | -4.548029 | 0.531853  | -0.231756 |
| H  | -5.029030 | 1.505662  | -0.267139 |
| C  | -5.305545 | -0.614408 | -0.201949 |
| H  | -6.390553 | -0.559438 | -0.213181 |
| C  | -4.648079 | -1.856047 | -0.160164 |
| H  | -5.201464 | -2.789906 | -0.140528 |
| C  | -3.275545 | -1.879396 | -0.146991 |
| H  | -2.728343 | -2.817956 | -0.110388 |
| C  | -0.455298 | -1.074582 | 1.951310  |
| O  | -0.536822 | -1.488730 | 3.035788  |
| C  | 1.374366  | 1.892468  | -0.731908 |
| H  | 1.471104  | 1.842921  | -1.826435 |
| H  | 2.106200  | 2.633007  | -0.385368 |

**TS<sub>12-13</sub>**

SCF done: -1176.114604

|    |           |           |           |
|----|-----------|-----------|-----------|
| C  | 0.461165  | 0.906148  | 0.000000  |
| C  | 0.218219  | 2.140000  | 0.593573  |
| C  | -1.059087 | 2.402034  | 1.085561  |
| C  | -2.027372 | 1.408709  | 1.034773  |
| C  | -1.701094 | 0.211823  | 0.398830  |
| N  | -0.508572 | -0.005055 | -0.167162 |
| H  | -1.276279 | 3.356717  | 1.558481  |
| H  | 1.022376  | 2.864685  | 0.702654  |
| H  | -3.002516 | 1.530841  | 1.497203  |
| Ru | 0.124550  | -1.694226 | 1.686726  |
| P  | 2.145861  | -1.187611 | 0.679158  |
| C  | 0.407858  | -3.546279 | 1.683013  |

|   |           |           |           |                           |           |           |           |
|---|-----------|-----------|-----------|---------------------------|-----------|-----------|-----------|
| O | 0.622050  | -4.668049 | 1.953487  | C                         | -3.068798 | 0.582240  | 2.606320  |
| C | 3.617835  | -0.715440 | 1.818670  | H                         | -3.082318 | 1.165842  | 3.537776  |
| C | 2.718370  | -2.416515 | -0.694037 | H                         | -4.108454 | 0.470094  | 2.278102  |
| C | 3.670883  | -1.744691 | 2.950005  | H                         | -2.669653 | -0.412197 | 2.846874  |
| H | 4.524529  | -1.512967 | 3.602312  | C                         | -0.835222 | 1.555516  | 2.224876  |
| H | 2.758817  | -1.725302 | 3.555384  | H                         | -0.978363 | 2.160868  | 3.131605  |
| H | 3.799716  | -2.768546 | 2.578955  | H                         | -0.353818 | 0.613710  | 2.517547  |
| C | 4.967026  | -0.662348 | 1.106614  | H                         | -0.146808 | 2.103121  | 1.569598  |
| H | 4.957932  | 0.014123  | 0.242340  | C                         | -3.288727 | -1.139654 | -1.961402 |
| H | 5.717582  | -0.278291 | 1.811979  | H                         | -3.197899 | -0.348507 | -2.715266 |
| H | 5.310286  | -1.648844 | 0.777512  | H                         | -2.380000 | -1.755320 | -1.989420 |
| C | 3.310854  | -3.677532 | -0.064131 | H                         | -4.139185 | -1.769334 | -2.256245 |
| H | 3.527681  | -4.400522 | -0.863082 | C                         | -2.825227 | 2.651821  | 1.220616  |
| H | 4.256449  | -3.480258 | 0.455610  | H                         | -3.793671 | 2.557835  | 0.718755  |
| H | 2.624148  | -4.163429 | 0.635757  | H                         | -2.988414 | 3.225751  | 2.144451  |
| C | 1.466323  | -2.798481 | -1.490904 | H                         | -2.164324 | 3.253979  | 0.584832  |
| H | 1.757379  | -3.516873 | -2.270160 | N                         | 4.385946  | 0.760633  | -0.228835 |
| H | 0.702371  | -3.262109 | -0.858247 | C                         | 3.135144  | 0.606879  | 0.225016  |
| H | 1.002949  | -1.936543 | -1.987704 | C                         | 2.798683  | -0.299569 | 1.233814  |
| C | 3.357414  | 0.670777  | 2.414427  | H                         | 1.773370  | -0.368849 | 1.597079  |
| H | 3.490485  | 1.470378  | 1.675263  | C                         | 3.798232  | -1.119682 | 1.745351  |
| H | 2.365698  | 0.773050  | 2.862242  | H                         | 3.566203  | -1.844483 | 2.521681  |
| H | 4.093551  | 0.844988  | 3.211171  | C                         | 5.086332  | -0.998519 | 1.245728  |
| C | 3.739261  | -1.834099 | -1.677068 | H                         | 5.895426  | -1.626124 | 1.608999  |
| H | 4.715534  | -1.642838 | -1.226541 | C                         | 5.327924  | -0.035283 | 0.267954  |
| H | 3.894803  | -2.571046 | -2.477488 | H                         | 6.332547  | 0.099487  | -0.134067 |
| H | 3.399452  | -0.912172 | -2.162390 | C                         | 1.655461  | -1.927498 | -1.064395 |
| N | -3.002591 | -1.349273 | 1.658646  | O                         | 2.555064  | -2.394614 | -1.630168 |
| C | -2.555922 | -1.003081 | 0.442743  |                           |           |           |           |
| C | -2.754475 | -1.787431 | -0.696751 |                           |           |           |           |
| H | -2.344093 | -1.461412 | -1.648910 | <b>TS<sub>13-14</sub></b> |           |           |           |
| C | -3.446287 | -2.980192 | -0.564734 | SCF done: -1176.152573    |           |           |           |
| H | -3.619144 | -3.616344 | -1.429474 | C                         | 0.039459  | 2.078607  | 0.885437  |
| C | -3.902035 | -3.358185 | 0.694931  | C                         | -0.291728 | 3.418312  | 0.993056  |
| H | -4.433027 | -4.293612 | 0.846126  | C                         | -1.611539 | 3.816804  | 0.751634  |
| C | -3.653503 | -2.512109 | 1.768313  | C                         | -2.553920 | 2.875232  | 0.396941  |
| H | -3.987482 | -2.778188 | 2.770760  | C                         | -2.164017 | 1.535222  | 0.279388  |
| C | 0.353899  | -0.517055 | 3.176385  | N                         | -0.889305 | 1.157026  | 0.536030  |
| O | 0.523178  | -0.104826 | 4.257245  | H                         | -1.886417 | 4.865584  | 0.834258  |
| C | 1.816395  | 0.390223  | -0.360681 | H                         | 0.474810  | 4.140758  | 1.262072  |
| H | 1.817986  | 0.076995  | -1.409552 | H                         | -3.589762 | 3.122349  | 0.184975  |
| H | 2.613927  | 1.127717  | -0.221244 | Ru                        | -0.431579 | -0.916121 | 0.194518  |
|   |           |           |           | H                         | 2.163800  | 2.369767  | 1.107052  |
|   |           |           |           | P                         | 1.779952  | 0.140269  | -0.053434 |
|   |           |           |           | C                         | 1.421693  | 1.562722  | 1.130876  |
|   |           |           |           | H                         | 1.455400  | 1.109869  | 2.130659  |
|   |           |           |           | C                         | -0.098714 | -2.672608 | -0.358407 |
|   |           |           |           | O                         | 0.088026  | -3.756446 | -0.731090 |
|   |           |           |           | C                         | 3.367400  | -0.662446 | 0.666196  |
|   |           |           |           | C                         | 2.177878  | 1.043302  | -1.710173 |
|   |           |           |           | C                         | 3.531782  | -2.033810 | 0.006000  |
|   |           |           |           | H                         | 4.401737  | -2.541356 | 0.445670  |
|   |           |           |           | H                         | 2.653028  | -2.666669 | 0.176543  |
|   |           |           |           | H                         | 3.699055  | -1.971188 | -1.074377 |
|   |           |           |           | C                         | 4.640186  | 0.159770  | 0.492586  |
|   |           |           |           | H                         | 4.541450  | 1.166091  | 0.919251  |
|   |           |           |           | H                         | 5.463471  | -0.340054 | 1.023181  |
|   |           |           |           | H                         | 4.942900  | 0.253093  | -0.555994 |
|   |           |           |           | C                         | 2.845524  | 0.047148  | -2.657263 |
|   |           |           |           | H                         | 2.918940  | 0.491494  | -3.659640 |
|   |           |           |           | H                         | 3.861600  | -0.217871 | -2.342590 |
|   |           |           |           | H                         | 2.256700  | -0.876125 | -2.748030 |
|   |           |           |           | C                         | 0.851159  | 1.473330  | -2.342773 |
|   |           |           |           | H                         | 1.062827  | 1.927008  | -3.321409 |
|   |           |           |           | H                         | 0.177246  | 0.623013  | -2.495063 |
|   |           |           |           | H                         | 0.320371  | 2.223277  | -1.742602 |
|   |           |           |           | C                         | 3.144560  | -0.886365 | 2.163647  |
|   |           |           |           | H                         | 3.188326  | 0.048835  | 2.734688  |
|   |           |           |           | H                         | 2.191889  | -1.383861 | 2.377742  |
|   |           |           |           | H                         | 3.947468  | -1.532589 | 2.543946  |
|   |           |           |           | C                         | 3.042563  | 2.293248  | -1.550087 |
|   |           |           |           | H                         | 4.024518  | 2.095866  | -1.111456 |

**13**  
SCF done: -1176.166112

|    |           |           |           |
|----|-----------|-----------|-----------|
| C  | -0.056153 | 1.884660  | -1.096691 |
| C  | 0.243271  | 3.210573  | -1.388130 |
| C  | 1.539444  | 3.674505  | -1.199103 |
| C  | 2.489665  | 2.805698  | -0.696354 |
| C  | 2.122847  | 1.494602  | -0.386906 |
| N  | 0.873887  | 1.028720  | -0.609619 |
| H  | 1.797551  | 4.704546  | -1.432492 |
| H  | -0.538188 | 3.860930  | -1.773420 |
| H  | 3.517721  | 3.105203  | -0.520359 |
| Ru | 0.169108  | -1.104671 | -0.223639 |
| H  | -2.153395 | 2.165816  | -1.458892 |
| P  | -1.896463 | 0.150978  | 0.066011  |
| C  | -1.433986 | 1.350406  | -1.313166 |
| H  | -1.430995 | 0.732067  | -2.219647 |
| C  | -0.549114 | -2.767466 | 0.100649  |
| O  | -1.027759 | -3.809839 | 0.323480  |
| C  | -3.551337 | -0.582534 | -0.558995 |
| C  | -2.200895 | 1.304499  | 1.576407  |
| C  | -3.953490 | -1.757385 | 0.338102  |
| H  | -4.862779 | -2.216376 | -0.074964 |
| H  | -3.180343 | -2.532719 | 0.370616  |
| H  | -4.181448 | -1.455934 | 1.364855  |
| C  | -4.692468 | 0.428119  | -0.630591 |
| H  | -4.442180 | 1.300933  | -1.247453 |
| H  | -5.567001 | -0.053047 | -1.091676 |
| H  | -5.004159 | 0.782138  | 0.359191  |

|   |           |           |           |
|---|-----------|-----------|-----------|
| H | 3.211945  | 2.733863  | -2.543219 |
| H | 2.541223  | 3.060373  | -0.945830 |
| N | -4.349959 | 0.750673  | -0.304035 |
| C | -3.043598 | 0.473049  | -0.165967 |
| C | -2.439152 | -0.787703 | -0.440513 |
| H | -1.310073 | -0.648624 | -1.281788 |
| C | -3.331509 | -1.789540 | -0.886076 |
| H | -2.949350 | -2.778331 | -1.136596 |
| C | -4.678471 | -1.517044 | -0.997622 |
| H | -5.377538 | -2.286593 | -1.317465 |
| C | -5.146258 | -0.226045 | -0.703031 |
| H | -6.205802 | 0.012055  | -0.802529 |
| C | -0.399667 | -1.403300 | 2.065371  |
| O | -0.428550 | -1.733292 | 3.176504  |

#### 14

|                        |           |           |           |
|------------------------|-----------|-----------|-----------|
| SCF done: -1176.171486 |           |           |           |
| C                      | 0.011426  | 2.241211  | -0.566528 |
| C                      | -0.356082 | 3.581329  | -0.610365 |
| C                      | -1.700748 | 3.919603  | -0.466196 |
| C                      | -2.648326 | 2.921151  | -0.323233 |
| C                      | -2.221419 | 1.594981  | -0.270762 |
| N                      | -0.908082 | 1.287789  | -0.334132 |
| H                      | -2.004341 | 4.963511  | -0.493872 |
| H                      | 0.401774  | 4.342230  | -0.779841 |
| H                      | -3.713712 | 3.118484  | -0.255243 |
| Ru                     | -0.447817 | -0.793476 | -0.041435 |
| H                      | -0.426504 | -0.836905 | -1.702672 |
| P                      | 1.828541  | 0.111300  | -0.146867 |
| C                      | -0.149738 | -2.631287 | -0.214252 |
| O                      | 0.032740  | -3.760276 | -0.405912 |
| C                      | 2.676485  | 0.591948  | 1.507385  |
| C                      | 3.122547  | -0.578686 | -1.383856 |
| C                      | 2.798385  | -0.658785 | 2.379629  |
| H                      | 3.186451  | -0.373440 | 3.367397  |
| H                      | 1.829286  | -1.146283 | 2.531737  |
| H                      | 3.486686  | -1.398590 | 1.957460  |
| C                      | 4.046931  | 1.245878  | 1.361310  |
| H                      | 4.025696  | 2.127045  | 0.707709  |
| H                      | 4.384517  | 1.586803  | 2.350591  |
| H                      | 4.806643  | 0.551496  | 0.986283  |
| C                      | 3.861356  | -1.742101 | -0.722346 |
| H                      | 4.459395  | -2.265868 | -1.480773 |
| H                      | 4.550475  | -1.413970 | 0.064959  |
| H                      | 3.164695  | -2.474077 | -0.291480 |
| C                      | 2.350897  | -1.130843 | -2.584352 |
| H                      | 3.075258  | -1.514586 | -3.316807 |
| H                      | 1.680117  | -1.948372 | -2.302478 |
| H                      | 1.743082  | -0.369085 | -3.086822 |
| C                      | 1.747063  | 1.586982  | 2.208451  |
| H                      | 1.698741  | 2.552752  | 1.690298  |
| H                      | 0.726232  | 1.204869  | 2.313381  |
| H                      | 2.132182  | 1.777710  | 3.219606  |
| C                      | 4.121358  | 0.460147  | -1.893455 |
| H                      | 4.745220  | 0.886173  | -1.103587 |
| H                      | 4.794493  | -0.023384 | -2.615503 |
| H                      | 3.628180  | 1.284939  | -2.422262 |
| C                      | -3.120144 | 0.441396  | -0.202202 |
| C                      | -5.253701 | -0.352628 | -0.207330 |
| H                      | -6.323304 | -0.138763 | -0.208076 |
| C                      | -4.795220 | -1.670781 | -0.209076 |
| H                      | -5.506855 | -2.493717 | -0.217528 |
| C                      | -3.427080 | -1.910119 | -0.193632 |
| H                      | -3.060590 | -2.936421 | -0.184273 |
| C                      | -0.683444 | -0.848807 | 1.914516  |
| O                      | -0.896808 | -0.977144 | 3.042132  |
| C                      | -2.525819 | -0.840550 | -0.189419 |
| N                      | -4.437425 | 0.693129  | -0.206331 |
| C                      | 1.402368  | 1.785890  | -0.893757 |
| H                      | 1.431952  | 1.619132  | -1.980984 |
| H                      | 2.148604  | 2.559108  | -0.670761 |

#### TS<sub>14-15</sub>

|                        |           |           |           |
|------------------------|-----------|-----------|-----------|
| SCF done: -1360.707320 |           |           |           |
| C                      | -0.082952 | 2.434912  | -0.459107 |
| C                      | 0.279609  | 3.767636  | -0.300015 |
| C                      | 1.612527  | 4.083199  | -0.042326 |
| C                      | 2.554915  | 3.073212  | 0.042735  |
| C                      | 2.136957  | 1.752990  | -0.112082 |
| N                      | 0.837770  | 1.460108  | -0.340878 |
| H                      | 1.909149  | 5.121501  | 0.085818  |
| H                      | -0.476255 | 4.543924  | -0.388211 |
| H                      | 3.607750  | 3.256921  | 0.233536  |
| Ru                     | 0.385944  | -0.641914 | -0.360618 |
| H                      | 0.677678  | -0.486601 | 1.398783  |
| P                      | -1.897084 | 0.299319  | -0.181656 |
| C                      | 0.099733  | -2.502371 | -0.189073 |
| O                      | -0.051187 | -3.648159 | -0.205730 |
| C                      | -3.250520 | -0.384513 | -1.366016 |
| C                      | -2.606254 | 0.669072  | 1.564449  |
| C                      | -3.220596 | -1.908411 | -1.213270 |
| H                      | -4.026915 | -2.347162 | -1.817279 |
| H                      | -2.271711 | -2.332110 | -1.560169 |
| C                      | -3.368600 | -2.232302 | -0.175546 |
| H                      | -4.668377 | 0.117841  | -1.111099 |
| H                      | -4.732255 | 1.212921  | -1.092125 |
| H                      | -5.316518 | -0.234874 | -1.925891 |
| C                      | -5.085924 | -0.275549 | -0.178555 |
| H                      | -2.893943 | -0.665198 | 2.251412  |
| H                      | -3.166744 | -0.481295 | 3.299923  |
| H                      | -3.736742 | -1.193563 | 1.787271  |
| H                      | -2.022713 | -1.333768 | 2.244406  |
| C                      | -1.513272 | 1.416824  | 2.334269  |
| H                      | -1.839891 | 1.525141  | 3.377512  |
| H                      | -0.553440 | 0.893774  | 2.343448  |
| C                      | -1.353490 | 2.428338  | 1.939156  |
| H                      | -2.880841 | -0.030818 | -2.806795 |
| H                      | -3.075734 | 1.024256  | -3.036099 |
| H                      | -1.838349 | -0.257505 | -3.054208 |
| C                      | -3.508905 | -0.627555 | -3.482257 |
| H                      | -3.851993 | 1.554898  | 1.597124  |
| H                      | -4.756301 | 1.047118  | 1.257883  |
| H                      | -4.027359 | 1.861125  | 2.637865  |
| C                      | -3.732422 | 2.476125  | 1.012199  |
| H                      | 3.033317  | 0.596240  | -0.042738 |
| C                      | 5.147611  | -0.204516 | 0.226926  |
| H                      | 6.204994  | 0.007164  | 0.389902  |
| C                      | 4.700586  | -1.520992 | 0.106988  |
| H                      | 5.407833  | -2.344296 | 0.178450  |
| C                      | 3.346935  | -1.757190 | -0.097591 |
| H                      | 2.984128  | -2.781211 | -0.182951 |
| C                      | 0.492084  | -0.792647 | -2.270075 |
| O                      | 0.658693  | -0.921310 | -3.407308 |
| C                      | 2.456912  | -0.684079 | -0.183076 |
| N                      | 4.335598  | 0.842435  | 0.156474  |
| C                      | -1.482728 | 2.026261  | -0.821409 |
| H                      | -2.208085 | 2.788150  | -0.508466 |
| H                      | -1.540010 | 1.961224  | -1.916126 |
| N                      | 0.685235  | -1.706488 | 3.030907  |
| N                      | 1.133943  | -0.670282 | 2.696980  |
| O                      | 0.002143  | -2.638220 | 2.655201  |

#### 15

|                        |           |          |           |
|------------------------|-----------|----------|-----------|
| SCF done: -1360.740519 |           |          |           |
| C                      | 0.102699  | 2.189371 | -0.729589 |
| C                      | -0.233560 | 3.526365 | -0.901994 |
| C                      | -1.559490 | 3.921964 | -0.735552 |
| C                      | -2.526277 | 2.981191 | -0.421444 |
| C                      | -2.135217 | 1.658765 | -0.234663 |
| N                      | -0.837133 | 1.296489 | -0.360498 |
| H                      | -1.835334 | 4.964550 | -0.873335 |
| H                      | 0.534162  | 4.239826 | -1.190318 |

|    |           |           |           |   |           |           |           |
|----|-----------|-----------|-----------|---|-----------|-----------|-----------|
| H  | -3.579428 | 3.223334  | -0.316944 | H | -4.558737 | -1.490060 | 0.424033  |
| Ru | -0.421525 | -0.719241 | 0.308695  | C | -4.488712 | 0.550717  | -1.446166 |
| H  | -0.902259 | 0.261558  | -2.179100 | H | -4.088997 | 1.440411  | -1.947483 |
| P  | 1.930881  | 0.124247  | -0.063142 | H | -5.224980 | 0.104130  | -2.129505 |
| C  | -0.145625 | -2.502438 | 0.875005  | H | -5.030504 | 0.875274  | -0.554830 |
| O  | 0.015132  | -3.595361 | 1.202145  | C | -2.498208 | -0.803929 | 2.520291  |
| C  | 2.806903  | 0.858313  | 1.481668  | H | -2.827498 | -0.622012 | 3.553150  |
| C  | 3.188254  | -0.769007 | -1.192086 | H | -3.132527 | -1.599116 | 2.111201  |
| C  | 2.858642  | -0.222148 | 2.564675  | H | -1.461185 | -1.154882 | 2.551591  |
| H  | 3.329627  | 0.192486  | 3.466710  | C | -1.680060 | 1.542993  | 2.360909  |
| H  | 1.860425  | -0.573587 | 2.845808  | H | -1.956022 | 1.648388  | 3.419569  |
| H  | 3.446897  | -1.093960 | 2.256367  | H | -0.633498 | 1.226252  | 2.317522  |
| C  | 4.219556  | 1.377709  | 1.226096  | H | -1.791699 | 2.533146  | 1.900233  |
| H  | 4.255246  | 2.124473  | 0.423242  | C | -2.790995 | -0.919169 | -2.485480 |
| H  | 4.582398  | 1.868997  | 2.140117  | H | -2.289341 | -0.101520 | -3.017778 |
| H  | 4.928341  | 0.577547  | 0.989167  | H | -2.074653 | -1.738341 | -2.360382 |
| C  | 3.868476  | -1.865693 | -0.372385 | H | -3.596589 | -1.281098 | -3.139317 |
| H  | 4.462847  | -2.497324 | -1.046501 | C | -4.037222 | 1.038118  | 1.805852  |
| H  | 4.550325  | -1.468699 | 0.388545  | H | -4.787530 | 0.309903  | 1.479538  |
| H  | 3.134537  | -2.517045 | 0.121824  | H | -4.258011 | 1.277129  | 2.855882  |
| C  | 2.382542  | -1.439734 | -2.305974 | H | -4.173244 | 1.963417  | 1.231126  |
| H  | 3.081408  | -1.984272 | -2.955812 | C | 2.974116  | 0.660620  | -0.224688 |
| H  | 1.640392  | -2.145730 | -1.920981 | C | 5.129526  | -0.054493 | -0.070974 |
| H  | 1.844755  | -0.722767 | -2.939012 | H | 6.184337  | 0.199921  | 0.036500  |
| C  | 1.968578  | 2.037201  | 1.984394  | C | 4.731591  | -1.387976 | -0.168608 |
| H  | 2.033559  | 2.904425  | 1.316040  | H | 5.474238  | -2.181503 | -0.132287 |
| H  | 0.910879  | 1.794470  | 2.124246  | C | 3.379018  | -1.679543 | -0.298769 |
| H  | 2.357988  | 2.353471  | 2.961858  | H | 3.052883  | -2.717518 | -0.356293 |
| C  | 4.231380  | 0.143109  | -1.835394 | C | 0.381367  | -0.836505 | -2.201699 |
| H  | 4.917166  | 0.604146  | -1.120353 | O | 0.475559  | -0.923175 | -3.351376 |
| H  | 4.838868  | -0.460459 | -2.524358 | C | 2.447631  | -0.642349 | -0.330964 |
| H  | 3.771819  | 0.937274  | -2.436064 | N | 4.273665  | 0.960051  | -0.096844 |
| C  | -3.055408 | 0.552253  | 0.044819  | C | -1.637938 | 1.876836  | -0.753046 |
| C  | -5.197935 | -0.204003 | 0.171876  | H | -2.378184 | 2.622879  | -0.437701 |
| H  | -6.263805 | 0.024165  | 0.145351  | H | -1.745521 | 1.765861  | -1.842820 |
| C  | -4.761773 | -1.514550 | 0.374299  | N | 1.135632  | -1.740547 | 2.557876  |
| H  | -5.486790 | -2.317167 | 0.487208  | N | 2.110765  | -1.292234 | 3.074788  |
| C  | -3.397352 | -1.769654 | 0.434353  | O | 0.652282  | -0.455460 | 1.746210  |
| H  | -3.040295 | -2.785720 | 0.596517  |   |           |           |           |
| C  | -0.571157 | -0.146285 | 2.091948  |   |           |           |           |
| O  | -0.774753 | 0.149302  | 3.192033  |   |           |           |           |
| C  | -2.493470 | -0.719988 | 0.276775  |   |           |           |           |
| N  | -4.367940 | 0.818292  | 0.006260  |   |           |           |           |
| C  | 1.467157  | 1.658372  | -1.054865 |   |           |           |           |
| H  | 1.445025  | 1.324087  | -2.104180 |   |           |           |           |
| H  | 2.226598  | 2.447595  | -0.990672 |   |           |           |           |
| N  | -0.816016 | -1.481083 | -2.786593 |   |           |           |           |
| N  | -0.974081 | -0.280380 | -3.063586 |   |           |           |           |
| O  | -0.564980 | -1.863024 | -1.559389 |   |           |           |           |

**TS<sub>15-16</sub>**

SCF done: -1360.702981

|    |           |           |           |
|----|-----------|-----------|-----------|
| C  | -0.242137 | 2.352653  | -0.472468 |
| C  | 0.065704  | 3.702162  | -0.340977 |
| C  | 1.393828  | 4.081188  | -0.158838 |
| C  | 2.388366  | 3.118081  | -0.119954 |
| C  | 2.025383  | 1.779155  | -0.245090 |
| N  | 0.731134  | 1.427330  | -0.400850 |
| H  | 1.647287  | 5.133363  | -0.053116 |
| H  | -0.729361 | 4.441873  | -0.388745 |
| H  | 3.439625  | 3.354927  | 0.011417  |
| Ru | 0.376756  | -0.682497 | -0.320291 |
| H  | 1.787149  | -0.246406 | 2.418892  |
| P  | -1.976885 | 0.159738  | -0.044342 |
| C  | 0.134073  | -2.546412 | -0.107137 |
| O  | -0.027518 | -3.684028 | -0.003702 |
| C  | -3.401513 | -0.482563 | -1.152999 |
| C  | -2.610444 | 0.502836  | 1.729675  |
| C  | -4.007255 | -1.722869 | -0.493505 |
| H  | -4.714242 | -2.191259 | -1.192077 |
| H  | -3.238985 | -2.470133 | -0.252172 |

**16**

SCF done: -1251.375584

|    |           |           |           |
|----|-----------|-----------|-----------|
| C  | 0.041580  | 2.222194  | -0.593426 |
| C  | -0.313786 | 3.564246  | -0.704524 |
| C  | -1.649563 | 3.926638  | -0.557597 |
| C  | -2.608708 | 2.949297  | -0.345225 |
| C  | -2.193333 | 1.626072  | -0.226656 |
| N  | -0.886069 | 1.301064  | -0.288512 |
| H  | -1.941293 | 4.971123  | -0.639032 |
| H  | 0.449480  | 4.305596  | -0.927561 |
| H  | -3.670680 | 3.164270  | -0.278388 |
| Ru | -0.457174 | -0.785484 | -0.008189 |
| H  | -1.256204 | -0.948660 | -2.377459 |
| P  | 1.876229  | 0.116723  | -0.093226 |
| C  | -0.174664 | -2.640493 | -0.042706 |
| O  | -0.009816 | -3.780630 | -0.135431 |
| C  | 2.635759  | 0.657953  | 1.583027  |
| C  | 3.225985  | -0.590689 | -1.252475 |
| C  | 2.720230  | -0.563061 | 2.501324  |
| H  | 3.087621  | -0.247378 | 3.487848  |
| H  | 1.743811  | -1.036180 | 2.648070  |
| H  | 3.410608  | -1.323914 | 2.121850  |
| C  | 4.013680  | 1.304983  | 1.478141  |
| H  | 4.031278  | 2.145783  | 0.773724  |
| H  | 4.294238  | 1.701442  | 2.464463  |
| H  | 4.791052  | 0.590588  | 1.187193  |
| C  | 3.872306  | -1.787279 | -0.553971 |
| H  | 4.526343  | -2.307656 | -1.266838 |
| H  | 4.492023  | -1.495062 | 0.302221  |
| H  | 3.120804  | -2.510431 | -0.209592 |
| C  | 2.522242  | -1.092452 | -2.516235 |
| H  | 3.267330  | -1.614348 | -3.133680 |



|   |           |           |           |                        |           |           |           |
|---|-----------|-----------|-----------|------------------------|-----------|-----------|-----------|
| H | 1.684992  | -1.764308 | -2.306945 | C                      | -4.718538 | -1.619097 | -0.101741 |
| H | 2.105978  | -0.273940 | -3.113429 | H                      | -5.441481 | -2.421461 | 0.028074  |
| C | 1.683989  | 1.682444  | 2.207833  | C                      | -3.401587 | -1.762345 | 0.322566  |
| H | 1.670783  | 2.629247  | 1.653741  | H                      | -3.081697 | -2.691969 | 0.794111  |
| H | 0.654178  | 1.319545  | 2.286283  | C                      | -0.651649 | -0.324435 | 2.258267  |
| H | 2.029468  | 1.906177  | 3.226589  | O                      | -0.790640 | -0.208951 | 3.409209  |
| C | 4.298319  | 0.412853  | -1.675608 | C                      | -2.490663 | -0.716464 | 0.148941  |
| H | 4.945602  | 0.732991  | -0.855588 | N                      | -4.275483 | 0.599651  | -0.883998 |
| H | 4.939647  | -0.065039 | -2.429734 | C                      | 1.398074  | 2.090719  | 0.387027  |
| H | 3.867723  | 1.305684  | -2.144655 | H                      | 2.177552  | 2.762619  | 0.006893  |
| C | -3.107233 | 0.483314  | -0.104233 | H                      | 1.299178  | 2.284939  | 1.463825  |
| C | -5.248659 | -0.288564 | -0.040386 | O                      | -0.180239 | -2.071830 | -1.244743 |
| H | -6.314959 | -0.060206 | -0.024812 |                        |           |           |           |
| C | -4.808783 | -1.610945 | -0.012473 |                        |           |           |           |
| H | -5.530197 | -2.424278 | 0.022194  | <b>18</b>              |           |           |           |
| C | -3.441540 | -1.865799 | -0.019563 | SCF done: -1251.375607 |           |           |           |
| H | -3.085417 | -2.895237 | 0.017899  | C                      | 0.031608  | 2.217722  | -0.695847 |
| C | -0.662237 | -0.773594 | 1.877191  | C                      | -0.341387 | 3.542758  | -0.903534 |
| O | -0.879785 | -0.796124 | 3.015345  | C                      | -1.675359 | 3.902678  | -0.731391 |
| C | -2.533185 | -0.806366 | -0.067922 | C                      | -2.608483 | 2.944646  | -0.366802 |
| N | -4.419883 | 0.748508  | -0.087527 | C                      | -2.176506 | 1.637458  | -0.161142 |
| C | 1.428830  | 1.747684  | -0.910951 | N                      | -0.875502 | 1.306841  | -0.306954 |
| H | 1.442221  | 1.517574  | -1.986123 | H                      | -1.983895 | 4.933464  | -0.890452 |
| H | 2.171702  | 2.535739  | -0.732819 | H                      | 0.404042  | 4.272838  | -1.208810 |
| O | -0.363101 | -0.766530 | -2.069392 | H                      | -3.662733 | 3.165438  | -0.230516 |

**TS<sub>16-18</sub>**

SCF done: -1251.357874

|    |           |           |           |    |           |           |           |
|----|-----------|-----------|-----------|----|-----------|-----------|-----------|
| C  | 0.067978  | 2.376209  | -0.249446 | Ru | -0.401763 | -0.720767 | 0.234728  |
| C  | -0.235584 | 3.595424  | -0.846932 | H  | -0.963307 | -0.902236 | -3.345975 |
| C  | -1.518203 | 3.797095  | -1.353540 | P  | 1.849425  | 0.186034  | 0.052211  |
| C  | -2.470243 | 2.795212  | -1.247871 | C  | -0.621514 | -1.440522 | -1.593291 |
| C  | -2.105688 | 1.591760  | -0.647517 | O  | -0.600810 | -2.593014 | -1.963617 |
| N  | -0.855923 | 1.403786  | -0.180125 | C  | 2.467183  | 0.862849  | 1.734373  |
| H  | -1.771202 | 4.743326  | -1.826189 | C  | 3.275649  | -0.595360 | -0.946216 |
| H  | 0.521947  | 4.372836  | -0.906276 | C  | 2.592827  | -0.308580 | 2.712790  |
| H  | -3.485457 | 2.902197  | -1.617563 | H  | 2.801808  | 0.083261  | 3.718350  |
| H  | -3.485457 | 2.902197  | -1.617563 | H  | 1.665135  | -0.892369 | 2.765893  |
| Ru | -0.442445 | -0.634051 | 0.469050  | H  | 3.404849  | -0.994741 | 2.452635  |
| H  | -1.054111 | -2.342284 | -1.562909 | C  | 3.777552  | 1.639566  | 1.683203  |
| P  | 1.848435  | 0.259623  | 0.257939  | H  | 3.750290  | 2.457485  | 0.951907  |
| C  | -0.176132 | -2.527777 | 0.359973  | H  | 3.970836  | 2.089298  | 2.667981  |
| O  | -0.073563 | -3.673342 | 0.611253  | C  | 4.633321  | 0.995727  | 1.449723  |
| C  | 3.150367  | -0.048026 | 1.626950  | H  | 3.961508  | -1.650738 | -0.080522 |
| C  | 2.618198  | 0.126542  | -1.491361 | H  | 4.635756  | -2.248371 | -0.709493 |
| C  | 3.147826  | -1.557912 | 1.885404  | H  | 4.568501  | -1.206908 | 0.717228  |
| H  | 3.905406  | -1.794147 | 2.645645  | H  | 3.236229  | -2.341123 | 0.371587  |
| H  | 2.174908  | -1.900397 | 2.256510  | C  | 2.622951  | -1.309706 | -2.132121 |
| H  | 3.383119  | -2.141679 | 0.987614  | H  | 3.409222  | -1.794719 | -2.727481 |
| C  | 4.562950  | 0.423310  | 1.298909  | H  | 1.915501  | -2.082143 | -1.808527 |
| H  | 4.592345  | 1.485465  | 1.024116  | H  | 2.089223  | -0.620824 | -2.799080 |
| H  | 5.194250  | 0.296891  | 2.190077  | C  | 1.361376  | 1.787068  | 2.253194  |
| H  | 5.024763  | -0.160155 | 0.494571  | H  | 1.246521  | 2.692928  | 1.645303  |
| C  | 3.119379  | -1.305023 | -1.682184 | H  | 0.385228  | 1.282986  | 2.297876  |
| H  | 3.450878  | -1.433344 | -2.722303 | H  | 1.612684  | 2.104639  | 3.274726  |
| H  | 3.976378  | -1.536253 | -1.037502 | C  | 4.300625  | 0.407732  | -1.467267 |
| H  | 2.322801  | -2.035579 | -1.494740 | H  | 4.809806  | 0.953722  | -0.667108 |
| C  | 1.483938  | 0.384853  | -2.491512 | H  | 5.070473  | -0.132154 | -2.037013 |
| H  | 1.884161  | 0.245417  | -3.505828 | H  | 3.853558  | 1.139356  | -2.150739 |
| H  | 0.654422  | -0.317659 | -2.359696 | C  | -3.059173 | 0.522084  | 0.209185  |
| H  | 1.103922  | 1.413112  | -2.433106 | C  | -5.170349 | -0.221094 | 0.618672  |
| C  | 2.695336  | 0.659247  | 2.905165  | H  | -6.232495 | 0.009304  | 0.712668  |
| H  | 2.843598  | 1.744970  | 2.853334  | C  | -4.713383 | -1.527905 | 0.791044  |
| H  | 1.648822  | 0.456774  | 3.159658  | H  | -5.419641 | -2.325290 | 1.012509  |
| H  | 3.306371  | 0.292403  | 3.741325  | C  | -3.353118 | -1.786517 | 0.671524  |
| C  | 3.734462  | 1.125735  | -1.789421 | H  | -2.981430 | -2.803737 | 0.795544  |
| H  | 4.646724  | 0.947959  | -1.215577 | C  | -0.086788 | -2.459406 | 0.831426  |
| H  | 3.999628  | 1.039570  | -2.852716 | O  | 0.105792  | -3.535397 | 1.223983  |
| H  | 3.420664  | 2.164852  | -1.626809 | C  | -2.459395 | -0.746564 | 0.387775  |
| C  | -3.012728 | 0.447924  | -0.463435 | N  | -4.365635 | 0.795281  | 0.327612  |
| C  | -5.105676 | -0.421693 | -0.701174 | C  | 1.432484  | 1.736934  | -0.941960 |
| H  | -6.130656 | -0.283427 | -1.047511 | H  | 1.488804  | 1.412425  | -1.991293 |
|    |           |           |           | H  | 2.162656  | 2.547383  | -0.815449 |
|    |           |           |           | O  | -0.829563 | -0.436319 | -2.503661 |

|                           |              |           |           |              |           |           |
|---------------------------|--------------|-----------|-----------|--------------|-----------|-----------|
| <b>TS<sub>14-16</sub></b> |              |           | Ru        | 0.4177370    | -0.650656 | -0.386068 |
| SCF done:                 | -1360.682533 |           | H         | 0.9434660    | -1.761278 | 1.328783  |
| C                         | 0.011426     | 2.241211  | P         | -1.9208030   | 0.128081  | 0.033463  |
| C                         | -0.356082    | 3.581329  | C         | 0.1195220    | -2.473959 | -0.784522 |
| C                         | -1.700748    | 3.919603  | O         | -0.0697530   | -3.591281 | -1.007447 |
| C                         | -2.648326    | 2.921151  | C         | -2.7942920   | 0.997540  | -1.442577 |
| C                         | -2.221419    | 1.594981  | C         | -3.1908630   | -0.890303 | 1.045805  |
| N                         | -0.908082    | 1.287789  | C         | -2.9545100   | 0.013951  | -2.603185 |
| H                         | -2.004341    | 4.963511  | H         | -3.3770300   | 0.546513  | -3.466546 |
| H                         | 0.401774     | 4.342230  | H         | -1.9959490   | -0.409595 | -2.920863 |
| H                         | -3.713712    | 3.118484  | H         | -3.6287950   | -0.815419 | -2.368412 |
| Ru                        | -0.447817    | -0.793476 | C         | -4.1546850   | 1.597140  | -1.090537 |
| H                         | -0.425567    | -0.838814 | H         | -4.0995770   | 2.289482  | -0.241090 |
| P                         | 1.828541     | 0.111300  | H         | -4.5177720   | 2.174701  | -1.952533 |
| C                         | -0.149738    | -2.631287 | H         | -4.9126230   | 0.837423  | -0.872057 |
| O                         | 0.032740     | -3.760276 | C         | -3.9792870   | -1.783497 | 0.088937  |
| C                         | 2.676485     | 0.591948  | H         | -4.5813750   | -2.486877 | 0.679845  |
| C                         | 3.122547     | -0.578686 | H         | -4.6704460   | -1.224055 | -0.550915 |
| C                         | 2.798385     | -0.658785 | H         | -3.3138230   | -2.381275 | -0.549497 |
| H                         | 3.186451     | -0.373440 | C         | -2.4191230   | -1.801792 | 2.003381  |
| H                         | 1.829286     | -1.146283 | H         | -3.1481070   | -2.401163 | 2.566326  |
| H                         | 3.486686     | -1.398590 | H         | -1.7681060   | -2.499922 | 1.461849  |
| C                         | 4.046931     | 1.245878  | H         | -1.7936360   | -1.249847 | 2.712839  |
| H                         | 4.025696     | 2.127045  | C         | -1.8879050   | 2.144212  | -1.901652 |
| H                         | 4.384517     | 1.586803  | H         | -1.8148130   | 2.946041  | -1.157296 |
| H                         | 4.806643     | 0.551496  | H         | -0.8732860   | 1.814345  | -2.147757 |
| C                         | 3.861356     | -1.742101 | H         | -2.3158130   | 2.584442  | -2.812686 |
| H                         | 4.459395     | -2.265868 | C         | -4.1381530   | -0.020223 | 1.870393  |
| H                         | 4.550475     | -1.413970 | H         | -4.7611100   | 0.642868  | 1.263381  |
| H                         | 3.164695     | -2.474077 | H         | -4.8133290   | -0.678172 | 2.434932  |
| C                         | 2.350897     | -1.130843 | H         | -3.5989740   | 0.586926  | 2.606715  |
| H                         | 3.075258     | -1.514586 | C         | 3.0454580    | 0.647959  | -0.130921 |
| H                         | 1.680117     | -1.948372 | C         | 5.1940020    | -0.044119 | -0.430879 |
| H                         | 1.743082     | -0.369085 | H         | 6.2550040    | 0.207090  | -0.428966 |
| C                         | 1.747063     | 1.586982  | C         | 4.7766080    | -1.339741 | -0.733273 |
| H                         | 1.698741     | 2.552752  | H         | 5.5094770    | -2.109814 | -0.961846 |
| H                         | 0.726232     | 1.204869  | C         | 3.4154920    | -1.621281 | -0.743523 |
| H                         | 2.132182     | 1.777710  | H         | 3.0741870    | -2.625882 | -0.991926 |
| C                         | 4.121358     | 0.460147  | C         | 0.5244150    | -0.237144 | -2.191598 |
| H                         | 4.745220     | 0.886173  | O         | 0.6772930    | -0.063400 | -3.325946 |
| H                         | 4.794493     | -0.023384 | C         | 2.4989430    | -0.617989 | -0.428480 |
| H                         | 3.628180     | 1.284939  | N         | 4.3515100    | 0.939041  | -0.133792 |
| C                         | -3.120144    | 0.441396  | C         | -1.4658280   | 1.563752  | 1.149550  |
| C                         | -5.253701    | -0.352628 | H         | -1.3771920   | 1.105180  | 2.146183  |
| H                         | -6.323304    | -0.138763 | H         | -2.2423210   | 2.337942  | 1.185270  |
| C                         | -4.795220    | -1.670781 | O         | 0.2370620    | -0.372329 | 2.500493  |
| H                         | -5.506855    | -2.493717 | N         | 0.7745890    | -1.550208 | 2.456902  |
| C                         | -3.427080    | -1.910119 | N         | 1.0726850    | -2.359467 | 3.260895  |
| H                         | -3.060590    | -2.936421 |           |              |           |           |
| C                         | -0.683444    | -0.848807 |           |              |           |           |
| O                         | -0.896808    | -0.977144 |           |              |           |           |
| C                         | -2.525819    | -0.840550 |           |              |           |           |
| N                         | -4.437425    | 0.693129  |           |              |           |           |
| C                         | 1.402368     | 1.785890  |           |              |           |           |
| H                         | 1.431952     | 1.619132  |           |              |           |           |
| H                         | 2.148604     | 2.559108  |           |              |           |           |
| O                         | -0.844360    | -0.519528 |           |              |           |           |
| N                         | -1.009817    | -1.265784 |           |              |           |           |
| N                         | -1.467917    | -0.689505 |           |              |           |           |
| <b>TS<sub>14-17</sub></b> |              |           | <b>17</b> |              |           |           |
| SCF done:                 | -1360.668923 |           | SCF done: | -1360.719313 |           |           |
| C                         | -0.1170030   | 2.141091  | C         | 0.077581     | 2.252197  | -0.300507 |
| C                         | 0.2127970    | 3.444399  | C         | -0.281489    | 3.596071  | -0.298969 |
| C                         | 1.5308630    | 3.874201  | C         | -1.619824    | 3.944402  | -0.145443 |
| C                         | 2.5015400    | 2.991726  | C         | -2.577668    | 2.952378  | -0.012348 |
| C                         | 2.1128430    | 1.707318  | C         | -2.161228    | 1.625633  | 0.014040  |
| N                         | 0.8183830    | 1.328423  | N         | -0.854061    | 1.304045  | -0.093193 |
| H                         | 1.8002550    | 4.889631  | H         | -1.913012    | 4.991536  | -0.151249 |
| H                         | -0.5550850   | 4.098414  | H         | 0.483181     | 4.353210  | -0.452601 |
| H                         | 3.5541630    | 3.248934  | H         | -3.639585    | 3.159845  | 0.074829  |
|                           |              |           | Ru        | -0.428401    | -0.783764 | 0.167703  |
|                           |              |           | H         | -1.470513    | -0.735290 | -3.572475 |
|                           |              |           | P         | 1.918747     | 0.126540  | -0.009464 |
|                           |              |           | C         | -0.131961    | -2.645495 | 0.274681  |
|                           |              |           | O         | 0.045409     | -3.785231 | 0.300386  |
|                           |              |           | C         | 2.809793     | 0.530464  | 1.643896  |
|                           |              |           | C         | 3.172726     | -0.545713 | -1.290269 |
|                           |              |           | C         | 2.867089     | -0.739325 | 2.495730  |
|                           |              |           | H         | 3.363913     | -0.513170 | 3.449488  |
|                           |              |           | H         | 1.868703     | -1.123119 | 2.728565  |
|                           |              |           | H         | 3.431906     | -1.543063 | 2.011132  |

|                           |           |           |           |                        |           |           |           |
|---------------------------|-----------|-----------|-----------|------------------------|-----------|-----------|-----------|
| C                         | 4.221743  | 1.087926  | 1.478084  | H                      | 3.307428  | 0.528972  | -3.061609 |
| H                         | 4.251041  | 1.978861  | 0.838986  | C                      | 0.933585  | 1.161770  | 2.086568  |
| H                         | 4.599210  | 1.387079  | 2.466382  | H                      | 0.417883  | 2.000410  | 1.603171  |
| H                         | 4.924217  | 0.349873  | 1.076556  | H                      | 0.238741  | 0.309532  | 2.137759  |
| C                         | 3.883889  | -1.752697 | -0.679580 | H                      | 1.155729  | 1.465580  | 3.119621  |
| H                         | 4.486383  | -2.243348 | -1.456265 | C                      | 4.679593  | 0.044544  | -0.829316 |
| H                         | 4.563105  | -1.480666 | 0.137090  | H                      | 4.948488  | -0.067649 | 0.226036  |
| H                         | 3.167098  | -2.496027 | -0.304036 | H                      | 5.482402  | -0.422750 | -1.416960 |
| C                         | 2.360528  | -1.028027 | -2.493434 | H                      | 4.679819  | 1.113397  | -1.079960 |
| H                         | 3.050075  | -1.497490 | -3.209241 | C                      | -2.966648 | 0.536525  | 0.312896  |
| H                         | 1.587738  | -1.752413 | -2.215667 | C                      | -4.782505 | -0.034754 | 1.563569  |
| H                         | 1.853764  | -0.202854 | -3.007513 | H                      | -5.646641 | 0.297924  | 2.140034  |
| C                         | 1.980152  | 1.587554  | 2.378088  | C                      | -4.517520 | -1.395290 | 1.419618  |
| H                         | 2.017391  | 2.563215  | 1.878936  | H                      | -5.166555 | -2.130681 | 1.888065  |
| H                         | 0.929429  | 1.307772  | 2.497904  | C                      | -3.424349 | -1.774400 | 0.651998  |
| H                         | 2.395469  | 1.721280  | 3.386547  | H                      | -3.209057 | -2.829107 | 0.483541  |
| C                         | 4.186391  | 0.486129  | -1.782121 | C                      | 0.183291  | -2.518866 | 0.328306  |
| H                         | 4.871924  | 0.832652  | -1.004858 | O                      | 0.513871  | -3.558660 | 0.732954  |
| H                         | 4.795050  | 0.025775  | -2.573363 | C                      | -2.601972 | -0.805764 | 0.063012  |
| H                         | 3.695518  | 1.360266  | -2.226664 | N                      | -4.026421 | 0.923021  | 1.031617  |
| C                         | -3.073045 | 0.480463  | 0.124904  | C                      | 1.385151  | 1.629235  | -1.382983 |
| C                         | -5.210092 | -0.304798 | 0.178188  | H                      | 1.318537  | 1.236827  | -2.406588 |
| H                         | -6.277883 | -0.082745 | 0.178379  | H                      | 2.154381  | 2.411529  | -1.374586 |
| C                         | -4.763931 | -1.624517 | 0.232177  | O                      | -1.792669 | -1.458129 | -2.380921 |
| H                         | -5.481286 | -2.441318 | 0.269064  |                        |           |           |           |
| C                         | -3.395619 | -1.871983 | 0.244389  |                        |           |           |           |
| H                         | -3.031312 | -2.897743 | 0.292260  | <b>19</b>              |           |           |           |
| C                         | -0.534242 | -0.652638 | 2.032608  | SCF done: -1062.859162 |           |           |           |
| O                         | -0.701889 | -0.617086 | 3.177500  | C                      | -0.051494 | 2.086330  | -0.885133 |
| C                         | -2.500426 | -0.805114 | 0.190936  | C                      | -0.440489 | 3.421419  | -0.876666 |
| N                         | -4.387882 | 0.736638  | 0.123709  | C                      | -1.778117 | 3.738792  | -0.644306 |
| C                         | 1.455354  | 1.811536  | -0.678503 | C                      | -2.697534 | 2.725101  | -0.423420 |
| H                         | 1.391022  | 1.647883  | -1.765458 | C                      | -2.249293 | 1.406770  | -0.445361 |
| H                         | 2.205277  | 2.585574  | -0.476079 | N                      | -0.953879 | 1.106295  | -0.672288 |
| O                         | -0.702999 | -1.247377 | -1.903971 | H                      | -2.095305 | 4.778678  | -0.629072 |
| N                         | -0.867026 | -0.271382 | -2.859558 | H                      | 0.300753  | 4.199165  | -1.044074 |
| N                         | -0.429300 | 0.833956  | -2.933563 | H                      | -3.744389 | 2.916858  | -0.209840 |
|                           |           |           |           | Ru                     | -0.369954 | -0.910565 | -0.237757 |
|                           |           |           |           | H                      | -1.878846 | -1.267112 | -1.270992 |
|                           |           |           |           | P                      | 1.700136  | 0.104337  | -0.026527 |
| <b>TS<sub>18-19</sub></b> |           |           |           | C                      | 2.043935  | 0.874718  | 1.704555  |
| SCF done: -1251.340054    |           |           |           | C                      | 3.300047  | -0.613433 | -0.799692 |
| C                         | 0.046008  | 2.154664  | -0.979253 | C                      | 2.739915  | -0.163811 | 2.582106  |
| C                         | -0.253464 | 3.512004  | -0.939714 | H                      | 2.755329  | 0.192630  | 3.622004  |
| C                         | -1.516592 | 3.914178  | -0.514509 | H                      | 2.210886  | -1.125921 | 2.568431  |
| C                         | -2.444481 | 2.962626  | -0.121126 | H                      | 3.780281  | -0.333230 | 2.280283  |
| C                         | -2.089581 | 1.616928  | -0.180120 | C                      | 2.852861  | 2.167953  | 1.686425  |
| N                         | -0.870454 | 1.234462  | -0.615403 | H                      | 2.319035  | 2.978471  | 1.174257  |
| H                         | -1.767095 | 4.971532  | -0.476372 | H                      | 3.016483  | 2.502506  | 2.721275  |
| H                         | 0.500143  | 4.238559  | -1.232659 | H                      | 3.837503  | 2.054713  | 1.221428  |
| H                         | -3.428188 | 3.220995  | 0.257728  | C                      | 3.579481  | -1.979835 | -0.170361 |
| Ru                        | -0.314262 | -0.820346 | -0.238254 | H                      | 4.457749  | -2.420788 | -0.663165 |
| H                         | -2.174607 | -1.136540 | -1.146318 | H                      | 3.801367  | -1.920910 | 0.899463  |
| P                         | 1.817120  | 0.107383  | -0.345598 | H                      | 2.739369  | -2.669255 | -0.305769 |
| C                         | -0.537064 | -1.551757 | -2.174468 | C                      | 2.999635  | -0.840662 | -2.283714 |
| O                         | 0.374477  | -1.940791 | -2.868786 | H                      | 3.785522  | -1.476814 | -2.713326 |
| C                         | 2.252537  | 0.792342  | 1.393297  | H                      | 2.034341  | -1.346172 | -2.422646 |
| C                         | 3.363090  | -0.631526 | -1.203367 | H                      | 2.993058  | 0.094501  | -2.857002 |
| C                         | 2.892604  | -0.334036 | 2.206768  | C                      | 0.669902  | 1.169747  | 2.316882  |
| H                         | 3.017946  | -0.000429 | 3.246378  | H                      | 0.127485  | 1.954346  | 1.772657  |
| H                         | 2.256405  | -1.228471 | 2.221071  | H                      | 0.036005  | 0.272130  | 2.334126  |
| H                         | 3.880966  | -0.625676 | 1.836839  | H                      | 0.807780  | 1.522008  | 3.349886  |
| C                         | 3.140348  | 2.033507  | 1.380283  | C                      | 4.526112  | 0.283658  | -0.665354 |
| H                         | 2.660778  | 2.868776  | 0.852911  | H                      | 4.865513  | 0.375800  | 0.372932  |
| H                         | 3.307992  | 2.364227  | 2.415344  | H                      | 5.356364  | -0.156090 | -1.237084 |
| H                         | 4.121523  | 1.859968  | 0.930564  | H                      | 4.355618  | 1.291665  | -1.066117 |
| C                         | 3.391773  | -2.117370 | -0.841625 | C                      | -3.113826 | 0.251853  | -0.165668 |
| H                         | 4.275802  | -2.580356 | -1.301472 | C                      | -5.048890 | -0.541420 | 0.750707  |
| H                         | 3.446998  | -2.293456 | 0.239225  | H                      | -6.018395 | -0.309362 | 1.192707  |
| H                         | 2.502030  | -2.625174 | -1.229867 | C                      | -4.646947 | -1.869076 | 0.599448  |
| C                         | 3.187234  | -0.506397 | -2.718692 | H                      | -5.289115 | -2.677321 | 0.938743  |
| H                         | 3.978297  | -1.096751 | -3.201548 | C                      | -3.428682 | -2.124309 | -0.009598 |
| H                         | 2.224922  | -0.905172 | -3.055478 |                        |           |           |           |

|   |           |           |           |    |           |           |           |
|---|-----------|-----------|-----------|----|-----------|-----------|-----------|
| H | -3.087428 | -3.142836 | -0.183536 | N  | -0.959094 | 1.217024  | -0.335526 |
| C | 0.146342  | -2.660289 | 0.029954  | H  | -2.148380 | 4.868089  | -0.377549 |
| O | 0.472267  | -3.777390 | 0.175229  | H  | 0.273137  | 4.320409  | -0.664418 |
| C | -2.620402 | -1.054313 | -0.410178 | H  | -3.803002 | 2.978217  | -0.106111 |
| N | -4.303928 | 0.499537  | 0.388323  | Ru | -0.451089 | -0.855106 | -0.053269 |
| C | 1.354528  | 1.633858  | -1.104636 | H  | -0.482223 | -1.155775 | -1.578902 |
| H | 1.440084  | 1.258336  | -2.132108 | P  | 1.770725  | 0.092910  | -0.062881 |
| H | 2.072867  | 2.453822  | -0.984243 | C  | 2.428702  | 0.493129  | 1.691034  |

**TS<sub>19-20</sub>**

SCF done: -1062.856513

|    |           |           |           |
|----|-----------|-----------|-----------|
| C  | -0.051364 | 2.207793  | -0.567036 |
| C  | -0.462386 | 3.537494  | -0.555506 |
| C  | -1.816021 | 3.827857  | -0.403280 |
| C  | -2.729585 | 2.795398  | -0.260989 |
| C  | -2.259151 | 1.485194  | -0.266736 |
| N  | -0.944326 | 1.212744  | -0.415921 |
| H  | -2.152235 | 4.862023  | -0.393386 |
| H  | 0.273248  | 4.329707  | -0.671235 |
| H  | -3.793872 | 2.961744  | -0.126074 |
| Ru | -0.419319 | -0.861829 | -0.175048 |
| H  | -1.603758 | -1.230830 | -1.254349 |
| P  | 1.770902  | 0.114715  | -0.041264 |
| C  | 2.361154  | 0.518218  | 1.729527  |
| C  | 3.192287  | -0.502398 | -1.153496 |
| C  | 2.475734  | -0.791297 | 2.512203  |
| H  | 2.680484  | -0.562187 | 3.567713  |
| H  | 1.544562  | -1.369161 | 2.463156  |
| H  | 3.288309  | -1.429829 | 2.151155  |
| C  | 3.666028  | 1.299692  | 1.824171  |
| H  | 3.654328  | 2.218714  | 1.223693  |
| H  | 3.831804  | 1.598960  | 2.869312  |
| H  | 4.533515  | 0.702057  | 1.521793  |
| C  | 3.806873  | -1.750808 | -0.521722 |
| H  | 4.477607  | -2.228519 | -1.249270 |
| H  | 4.406020  | -1.517158 | 0.366309  |
| H  | 3.040667  | -2.486193 | -0.243458 |
| C  | 2.537326  | -0.909822 | -2.476573 |
| H  | 3.309212  | -1.319352 | -3.143646 |
| H  | 1.761942  | -1.669859 | -2.325917 |
| H  | 2.072410  | -0.062631 | -2.996546 |
| C  | 1.233297  | 1.342335  | 2.358416  |
| H  | 1.116137  | 2.328069  | 1.890266  |
| H  | 0.269291  | 0.818243  | 2.301802  |
| H  | 1.462384  | 1.508227  | 3.420465  |
| C  | 4.278089  | 0.533713  | -1.431507 |
| H  | 4.837248  | 0.815519  | -0.534105 |
| H  | 4.999682  | 0.110013  | -2.144732 |
| H  | 3.878412  | 1.448268  | -1.886012 |
| C  | -3.113372 | 0.307505  | -0.081261 |
| C  | -5.176402 | -0.538535 | 0.397796  |
| H  | -6.228520 | -0.342268 | 0.607019  |
| C  | -4.693560 | -1.847574 | 0.363217  |
| H  | -5.365684 | -2.681343 | 0.552169  |
| C  | -3.354129 | -2.061672 | 0.077238  |
| H  | -2.955483 | -3.073751 | 0.024646  |
| C  | -0.019849 | -2.652946 | 0.026863  |
| O  | 0.222662  | -3.789960 | 0.156364  |
| C  | -2.495336 | -0.971457 | -0.142556 |
| N  | -4.406078 | 0.522472  | 0.182502  |
| C  | 1.383535  | 1.817725  | -0.774486 |
| H  | 1.559709  | 1.713185  | -1.854368 |
| H  | 2.063441  | 2.603811  | -0.419132 |

**20**

SCF done: -1062.870764

|   |           |          |           |
|---|-----------|----------|-----------|
| C | -0.061961 | 2.202288 | -0.518254 |
| C | -0.465202 | 3.534370 | -0.526315 |
| C | -1.817137 | 3.832095 | -0.372421 |
| C | -2.737064 | 2.806931 | -0.221040 |
| C | -2.276439 | 1.493068 | -0.205121 |

|    |           |           |           |
|----|-----------|-----------|-----------|
| H  | -0.959094 | 1.217024  | -0.335526 |
| H  | -2.148380 | 4.868089  | -0.377549 |
| H  | 0.273137  | 4.320409  | -0.664418 |
| H  | -3.803002 | 2.978217  | -0.106111 |
| Ru | -0.451089 | -0.855106 | -0.053269 |
| H  | -0.482223 | -1.155775 | -1.578902 |
| P  | 1.770725  | 0.092910  | -0.062881 |
| C  | 2.428702  | 0.493129  | 1.691034  |
| C  | 3.182889  | -0.486508 | -1.213134 |
| C  | 2.560613  | -0.818917 | 2.466990  |
| H  | 2.789873  | -0.596805 | 3.518942  |
| H  | 1.628453  | -1.397121 | 2.437121  |
| H  | 3.362529  | -1.457391 | 2.083264  |
| C  | 3.742446  | 1.262939  | 1.746701  |
| H  | 3.709972  | 2.197335  | 1.171555  |
| H  | 3.960774  | 1.533908  | 2.790111  |
| H  | 4.588794  | 0.666199  | 1.387636  |
| C  | 2.501926  | -0.975855 | -2.494471 |
| H  | 3.272688  | -1.315042 | -3.201046 |
| H  | 1.822257  | -1.811733 | -2.295547 |
| H  | 1.922051  | -0.189482 | -2.994567 |
| C  | 4.197997  | 0.596365  | -1.573795 |
| H  | 4.942714  | 0.172561  | -2.262927 |
| H  | 3.734700  | 1.446950  | -2.088599 |
| H  | 4.740875  | 0.979642  | -0.704395 |
| C  | 1.333000  | 1.325030  | 2.364439  |
| H  | 1.195025  | 2.308063  | 1.896692  |
| H  | 0.363461  | 0.807220  | 2.358752  |
| H  | 1.606692  | 1.495822  | 3.415083  |
| C  | 3.892243  | -1.676451 | -0.568885 |
| H  | 3.179342  | -2.440538 | -0.230097 |
| H  | 4.554190  | -2.146685 | -1.309396 |
| H  | 4.516924  | -1.379337 | 0.282008  |
| C  | -3.140052 | 0.315168  | -0.051878 |
| H  | -5.246453 | -0.516556 | 0.168699  |
| C  | -6.316896 | -0.322980 | 0.252084  |
| C  | -4.760743 | -1.824495 | 0.184454  |
| H  | -5.453371 | -2.658676 | 0.277055  |
| C  | -3.391606 | -2.036983 | 0.083100  |
| H  | -3.002915 | -3.055311 | 0.098299  |
| C  | -0.122410 | -2.664080 | 0.132478  |
| O  | 0.077109  | -3.811019 | 0.205772  |
| C  | -2.507490 | -0.953440 | -0.034337 |
| N  | -4.456466 | 0.544575  | 0.052702  |
| C  | 1.363651  | 1.801122  | -0.766107 |
| H  | 1.499998  | 1.702140  | -1.852672 |
| H  | 2.059969  | 2.582997  | -0.434554 |

**21**

SCF done: -1364.667517

|    |           |           |           |
|----|-----------|-----------|-----------|
| C  | 0.063301  | 2.221746  | -0.774700 |
| C  | -0.309881 | 3.530790  | -1.061468 |
| C  | -1.649762 | 3.893830  | -0.952223 |
| C  | -2.591464 | 2.942893  | -0.596774 |
| C  | -2.159538 | 1.651518  | -0.304938 |
| N  | -0.847353 | 1.334394  | -0.340097 |
| H  | -1.956269 | 4.913713  | -1.172643 |
| H  | 0.440899  | 4.242877  | -1.394916 |
| H  | -3.655526 | 3.151370  | -0.543409 |
| Ru | -0.395521 | -0.665929 | 0.300762  |
| H  | -1.116143 | 0.481961  | -2.024577 |
| P  | 1.902479  | 0.205963  | -0.037577 |
| C  | -0.472152 | -1.248034 | -1.732127 |
| O  | -0.171465 | -2.331926 | -2.201141 |
| C  | 2.772072  | 1.016665  | 1.478411  |
| C  | 3.138069  | -0.829899 | -1.101543 |
| C  | 3.068684  | -0.084601 | 2.494476  |
| H  | 3.483840  | 0.358016  | 3.410692  |
| H  | 2.163819  | -0.640002 | -2.770860 |
| H  | 3.804991  | -0.804279 | 2.114392  |
| C  | 4.050638  | 1.802288  | 1.176939  |

|                           |              |           |           |                           |              |           |           |
|---------------------------|--------------|-----------|-----------|---------------------------|--------------|-----------|-----------|
| H                         | 3.941188     | 2.481802  | 0.322207  | C                         | 1.273670     | 2.142592  | 1.888303  |
| H                         | 4.288601     | 2.425149  | 2.050558  | H                         | 1.230705     | 2.935249  | 1.132243  |
| H                         | 4.916650     | 1.163867  | 0.996832  | H                         | 0.279774     | 1.690887  | 1.973375  |
| C                         | 2.909970     | -2.293939 | -0.710972 | H                         | 1.500514     | 2.623748  | 2.849405  |
| H                         | 3.668045     | -2.914533 | -1.208983 | C                         | 4.124387     | -1.506282 | 0.408055  |
| H                         | 3.004996     | -2.462883 | 0.369960  | H                         | 3.439573     | -2.154754 | 0.970644  |
| H                         | 1.924035     | -2.643971 | -1.036161 | H                         | 4.886395     | -2.156412 | -0.042298 |
| C                         | 2.810294     | -0.666071 | -2.586516 | H                         | 4.640694     | -0.844359 | 1.111423  |
| H                         | 3.392861     | -1.410727 | -3.146250 | C                         | -3.025042    | 0.553978  | 0.008083  |
| H                         | 1.756752     | -0.852201 | -2.816979 | C                         | -4.923245    | 0.085039  | 1.176056  |
| H                         | 3.100470     | 0.322294  | -2.965115 | H                         | -5.825407    | 0.465215  | 1.656572  |
| C                         | 1.776647     | 2.017057  | 2.073492  | C                         | -4.646849    | -1.280921 | 1.185505  |
| H                         | 1.628634     | 2.884079  | 1.417376  | H                         | -5.322174    | -1.971784 | 1.682951  |
| H                         | 0.796456     | 1.583338  | 2.284301  | C                         | -3.508846    | -1.724077 | 0.526917  |
| H                         | 2.181818     | 2.391177  | 3.023557  | H                         | -3.279756    | -2.787908 | 0.475288  |
| C                         | 4.610695     | -0.483732 | -0.911446 | C                         | 0.210858     | -2.589502 | 0.132065  |
| H                         | 4.964404     | -0.693730 | 0.104257  | O                         | 0.555089     | -3.693460 | 0.203774  |
| H                         | 5.202278     | -1.112037 | -1.592090 | C                         | -2.657363    | -0.808848 | -0.103644 |
| H                         | 4.831654     | 0.561443  | -1.158083 | N                         | -4.134219    | 0.995874  | 0.608019  |
| C                         | -3.062127    | 0.536914  | 0.001050  | C                         | 1.509785     | 1.522525  | -1.237816 |
| C                         | -5.196791    | -0.232908 | 0.193307  | H                         | 1.553728     | 1.005778  | -2.208512 |
| H                         | -6.265229    | -0.014629 | 0.176308  | H                         | 2.256265     | 2.325545  | -1.220239 |
| C                         | -4.744410    | -1.531471 | 0.426689  | O                         | -1.575589    | -1.527575 | -2.393605 |
| H                         | -5.458615    | -2.336436 | 0.585342  | C                         | -0.727798    | -0.625782 | 1.988654  |
| C                         | -3.376030    | -1.772598 | 0.456614  | O                         | -1.185704    | -0.748204 | 3.040630  |
| H                         | -3.010720    | -2.782002 | 0.644297  |                           |              |           |           |
| C                         | -0.137581    | -2.493658 | 0.665718  | <b>TS<sub>21-14</sub></b> |              |           |           |
| O                         | -0.013534    | -3.625906 | 0.855384  | SCF done:                 | -1364.591820 |           |           |
| C                         | -2.478687    | -0.724763 | 0.243201  | C                         | 0.181252     | 2.162300  | -1.089216 |
| N                         | -4.377733    | 0.790086  | -0.019434 | C                         | -0.073356    | 3.490918  | -0.858334 |
| C                         | 1.452092     | 1.723340  | -1.056015 | C                         | -1.392321    | 3.907710  | -0.590603 |
| H                         | 1.455788     | 1.396282  | -2.103475 | C                         | -2.427863    | 2.995264  | -0.490268 |
| H                         | 2.192626     | 2.528895  | -0.970119 | C                         | -2.158114    | 1.641088  | -0.672128 |
| O                         | -0.939330    | -0.288885 | -2.593096 | N                         | -0.877068    | 1.290951  | -1.022376 |
| C                         | -0.600056    | -0.312216 | 2.222668  | H                         | -1.589427    | 4.963802  | -0.425024 |
| O                         | -0.827086    | -0.207867 | 3.348433  | H                         | 0.742348     | 4.207883  | -0.883648 |
|                           |              |           |           | H                         | -3.440650    | 3.281850  | -0.225243 |
| <b>TS<sub>21-13</sub></b> |              |           |           | Ru                        | -0.406676    | -0.639850 | 0.393919  |
| SCF done:                 | -1364.616527 |           |           | H                         | -0.789760    | 0.421426  | -1.615064 |
| C                         | 0.117838     | 2.052306  | -1.088948 | P                         | 1.904924     | 0.151900  | -0.037685 |
| C                         | -0.231662    | 3.351449  | -1.444351 | C                         | -0.808731    | -1.897936 | -1.752379 |
| C                         | -1.552787    | 3.765483  | -1.307146 | O                         | -1.099325    | -3.051977 | -1.736018 |
| C                         | -2.506113    | 2.877704  | -0.831017 | C                         | 2.816715     | 1.119899  | 1.358102  |
| C                         | -2.106571    | 1.585913  | -0.507123 | C                         | 3.179770     | -0.913203 | -1.008473 |
| N                         | -0.816001    | 1.208218  | -0.612367 | C                         | 2.858963     | 0.208910  | 2.587484  |
| H                         | -1.834989    | 4.780309  | -1.576234 | H                         | 3.317859     | 0.754885  | 3.423540  |
| H                         | 0.530097     | 4.025121  | -1.828228 | H                         | 1.855412     | -0.098894 | 2.899880  |
| H                         | -3.548102    | 3.149678  | -0.695956 | H                         | 3.452244     | -0.695530 | 2.418446  |
| Ru                        | -0.304594    | -0.779097 | 0.022191  | C                         | 4.228870     | 1.594867  | 1.023725  |
| H                         | -2.103504    | -1.240356 | -1.163071 | H                         | 4.261868     | 2.233760  | 0.131787  |
| P                         | 1.869949     | 0.151799  | -0.004823 | H                         | 4.598708     | 2.201205  | 1.863067  |
| C                         | -0.420852    | -1.038310 | -2.177968 | H                         | 4.939100     | 0.772897  | 0.889442  |
| O                         | 0.413842     | -0.653810 | -2.982900 | C                         | 2.400573     | -1.830896 | -1.952272 |
| C                         | 2.368187     | 1.112363  | 1.594741  | H                         | 3.122055     | -2.446481 | -2.507664 |
| C                         | 3.405639     | -0.758637 | -0.715128 | H                         | 1.733487     | -2.508159 | -1.406582 |
| C                         | 2.462666     | 0.161339  | 2.789182  | H                         | 1.795260     | -1.287047 | -2.685646 |
| H                         | 2.636346     | 0.753675  | 3.698134  | C                         | 4.173620     | -0.106066 | -1.842436 |
| H                         | 1.538506     | -0.404585 | 2.941728  | H                         | 4.854192     | -0.805138 | -2.348291 |
| H                         | 3.285937     | -0.552552 | 2.703601  | H                         | 3.677065     | 0.474360  | -2.629667 |
| C                         | 3.686161     | 1.874030  | 1.450968  | H                         | 4.789295     | 0.574731  | -1.249724 |
| H                         | 3.681013     | 2.570024  | 0.602728  | C                         | 1.987228     | 2.359506  | 1.697506  |
| H                         | 3.838355     | 2.477110  | 2.357222  | H                         | 2.046753     | 3.119404  | 0.908828  |
| H                         | 4.555486     | 1.215642  | 1.356911  | H                         | 0.932498     | 2.129458  | 1.882995  |
| C                         | 2.951826     | -1.796355 | -1.742579 | H                         | 2.390387     | 2.810251  | 2.614719  |
| C                         | 3.852150     | -2.277175 | -2.150272 | C                         | 3.919089     | -1.808409 | -0.011978 |
| H                         | 2.337815     | -2.580400 | -1.288479 | H                         | 3.222403     | -2.366184 | 0.628059  |
| H                         | 2.377691     | -1.363750 | -2.565123 | H                         | 4.507661     | -2.548127 | -0.571706 |
| C                         | 4.363499     | 0.209409  | -1.411604 | H                         | 4.616931     | -1.257866 | 0.628242  |
| H                         | 5.237209     | -0.360389 | -1.756935 | C                         | -3.045694    | 0.536687  | -0.360770 |
| H                         | 3.906935     | 0.661975  | -2.299311 | C                         | -5.191149    | -0.200282 | -0.196624 |
| H                         | 4.731061     | 1.009368  | -0.762570 | H                         | -6.256881    | 0.000637  | -0.312910 |



CO2  
SCF done: -188.498060  
C 0.000000 0.000000 0.000000  
O 0.000000 0.000000 1.164705  
O 0.000000 0.000000 -1.164705

CO  
SCF done: -113.248634  
C 0.000000 0.000000 -0.649957  
O 0.000000 0.000000 0.487468
